# Supplementary material for: Tomato Yield Heterosis Is Triggered by a Dosage Sensitivity of the Florigen Pathway That Fine-Tunes Shoot Architecture
Source: PLoS Genet. 2013 Dec 26;9(12):e1004043. doi: 10.1371/journal.pgen.1004043 (PMC3873276; doi:10.1371/journal.pgen.1004043)
Supplement: Dataset S3 — Marker genes selected by DDI and used in maturation score estimations all meristem DDI analyses involving the 6th expanding leaf, TM stage, and SYM stage. Included are gene IDs and functional annotations from tomato gene annotation iTAG version 2.3 [76]. (XLSX) [file pgen.1004043.s003.xlsx]

## Sheet: 6thL
geneID	functional annotation
Solyc00g022110	Ribosomal protein L2 (AHRD V1 ***- Q5M9S7_TOBAC); contains Interpro domain(s) IPR002171 Ribosomal protein L2
Solyc00g059100	WD-repeat protein-like (AHRD V1 **-- Q9FNN2_ARATH); contains Interpro domain(s) IPR020472 G-protein beta WD-40 repeat, region
Solyc01g006160	Unknown Protein (AHRD V1)
Solyc01g006540	Lipoxygenase (AHRD V1 **** Q96573_SOLLC); contains Interpro domain(s) IPR001246 Lipoxygenase, plant
Solyc01g007590	50S ribosomal protein L14 chloroplastic (AHRD V1 ***- D3WBB8_9BORA); contains Interpro domain(s) IPR005745 Ribosomal protein L14, bacterial-type
Solyc01g007600	50S ribosomal protein L16 chloroplastic (AHRD V1 ***- D3WCG3_NEROL); contains Interpro domain(s) IPR000114 Ribosomal protein L16
Solyc01g007630	50S ribosomal protein L2 chloroplastic (AHRD V1 ***- A6YA71_9MAGN); contains Interpro domain(s) IPR005880 Ribosomal protein L2, bacterial-type
Solyc01g009900	Glutaredoxin (AHRD V1 ***- B9GF65_POPTR); contains Interpro domain(s) IPR011905 Glutaredoxin-like, plant II
Solyc01g016470	Unknown Protein (AHRD V1); contains Interpro domain(s) IPR001813 Ribosomal protein 60S
Solyc01g050040	RING finger protein 13 (AHRD V1 *-*- RNF13_CHICK); contains Interpro domain(s) IPR018957 Zinc finger, C3HC4 RING-type
Solyc01g080260	At4g14280-like protein (Fragment) (AHRD V1 *-*- C7FD87_ARALP); contains Interpro domain(s) IPR011989 Armadillo-like helical
Solyc01g081250	Glutathione-S-transferase (AHRD V1 ***- A3FMP5_SOLLC); contains Interpro domain(s) IPR004046 Glutathione S-transferase, C-terminal
Solyc01g090730	Squamosa promoter binding protein 1 (AHRD V1 *-*- Q1MU24_PHYPA); contains Interpro domain(s) IPR004333 Transcription factor, SBP-box
Solyc01g091050	Pectinesterase (AHRD V1 ***- B9RD90_RICCO); contains Interpro domain(s) IPR000070 Pectinesterase, catalytic
Solyc01g095320	BCL-2-associated athanogene 6 (AHRD V1 *-*- D7LDX9_ARALY); contains Interpro domain(s) IPR003103 Apoptosis regulator Bcl-2 protein, BAG
Solyc01g097140	Dual-specificity tyrosine-phosphatase CDC25 (AHRD V1 **** Q10SX6_ORYSJ); contains Interpro domain(s) IPR001763 Rhodanese-like
Solyc01g097470	Neurogenic locus notch protein-like (AHRD V1 ***- B6SSE6_MAIZE)
Solyc01g099750	Heparan-alpha-glucosaminide N-acetyltransferase (AHRD V1 **-- D2QUR2_SPILD); contains Interpro domain(s) IPR019259 Protein of unknown function DUF2261, transmembrane
Solyc01g103030	Nitrate transporter (AHRD V1 **** Q7XAK5_PRUPE); contains Interpro domain(s) IPR000109 TGF-beta receptor, type I/II extracellular region
Solyc01g104650	BZIP transcription factor (AHRD V1 **** Q53UC6_WHEAT); contains Interpro domain(s) IPR011700 Basic leucine zipper
Solyc01g104740	Multiprotein bridging factor 1 (AHRD V1 ***- C8C4P8_WHEAT); contains Interpro domain(s) IPR013729 Multiprotein bridging factor 1, N-terminal
Solyc01g112260	Unknown Protein (AHRD V1)
Solyc02g014190	Genomic DNA chromosome 5 P1 clone MYJ24 (AHRD V1 **-- Q9FN44_ARATH); contains Interpro domain(s) IPR003594 ATP-binding region, ATPase-like
Solyc02g030100	Vacuolar protein sorting-associated protein 54 (AHRD V1 ***- B0CS25_LACBS)
Solyc02g030300	Serine/threonine-protein kinase receptor (AHRD V1 **** B6U2B7_MAIZE); contains Interpro domain(s) IPR002290 Serine/threonine protein kinase
Solyc02g061790	Activated RNA polymerase II transcriptional coactivator p15 (AHRD V1 **** C1BJV8_OSMMO); contains Interpro domain(s) IPR003173 Transcriptional coactivator p15
Solyc02g064720	Phototropic-responsive NPH3 family protein (AHRD V1 **-- D7MMM6_ARALY); contains Interpro domain(s) IPR004249 NPH3
Solyc02g064730	Expressed protein having alternate splicing products (AHRD V1 *--- Q75KB8_ORYSJ); contains Interpro domain(s) IPR015023 Protein of unknown function DUF1909
Solyc02g066930	RNA-binding protein (AHRD V1 *--* Q941H9_TOBAC); contains Interpro domain(s) IPR015465 RNA recognition motif, glycine rich protein
Solyc02g072440	Receptor like kinase, RLK
Solyc02g077100	Lipase-like protein (AHRD V1 ***- Q8LF19_ARATH); contains Interpro domain(s) IPR002921 Lipase, class 3
Solyc02g083250	Cellular retinaldehyde-binding/triple function C-terminal (AHRD V1 **-- B6SN40_MAIZE); contains Interpro domain(s) IPR001251 Cellular retinaldehyde-binding/triple function, C-terminal
Solyc02g085120	Laccase (AHRD V1 ***- Q9AUI0_PINTA); contains Interpro domain(s) IPR017761 Laccase
Solyc02g090140	Unknown Protein (AHRD V1)
Solyc03g006240	GDSL esterase/lipase At5g45910 (AHRD V1 ***- GDL83_ARATH); contains Interpro domain(s) IPR001087 Lipase, GDSL
Solyc03g006250	GDSL esterase/lipase At1g28590 (AHRD V1 **** GDL8_ARATH); contains Interpro domain(s) IPR001087 Lipase, GDSL
Solyc03g007310	Abscisic acid receptor PYL8 (AHRD V1 **-* PYL8_ARATH); contains Interpro domain(s) IPR019587 Polyketide cyclase/dehydrase
Solyc03g026180	Unknown Protein (AHRD V1)
Solyc03g043870	Ubiquitin ligase protein FANCL (AHRD V1 **-* B6T4M8_MAIZE); contains Interpro domain(s) IPR019162 Fanconi anemia complex, subunit FancL, WD-repeat region
Solyc03g045140	Cyclopropane-fatty-acyl-phospholipid synthase (AHRD V1 *-*- C7LRK7_DESBD); contains Interpro domain(s) IPR003333 Cyclopropane-fatty-acyl-phospholipid synthase
Solyc03g078300	Cc-nbs-lrr, resistance protein
Solyc03g096360	60S ribosomal protein L33-B (AHRD V1 ***- B6T1L8_MAIZE); contains Interpro domain(s) IPR001780 Ribosomal protein L35Ae
Solyc03g096760	Unknown Protein (AHRD V1)
Solyc03g111550	GDSL esterase/lipase At3g48460 (AHRD V1 ***- GDL57_ARATH); contains Interpro domain(s) IPR001087 Lipase, GDSL
Solyc03g113550	Transcription factor bHLH79 (AHRD V1 *-*- BH079_ARATH)
Solyc03g121300	Myrosinase-binding protein 2 (AHRD V1 **-- D7KIN1_ARALY); contains Interpro domain(s) IPR001229 Mannose-binding lectin
Solyc03g123540	class II heat shock protein (AHRD V1 ***- B6U175_MAIZE); contains Interpro domain(s) IPR002068 Heat shock protein Hsp20
Solyc03g124000	Unknown Protein (AHRD V1)
Solyc04g006980	CYCLOIDEA-like group 1B protein (Fragment) (AHRD V1 *-*- Q6VM90_LUPAG); contains Interpro domain(s) IPR005333 Transcription factor, TCP
Solyc04g008490	NADH dehydrogenase (AHRD V1 **** NDUB7_DICDI); contains Interpro domain(s) IPR008698 NADH:ubiquinone oxidoreductase, B18 subunit
Solyc04g011440	heat shock protein (AHRD V1 ***- B2D2G5_CAPSN); contains Interpro domain(s) IPR013126 Heat shock protein 70
Solyc04g014480	class I heat shock protein 3 (AHRD V1 ***- B6TQD6_MAIZE); contains Interpro domain(s) IPR002068 Heat shock protein Hsp20
Solyc04g051550	Unknown Protein (AHRD V1)
Solyc04g058180	Dehydration-responsive family protein (AHRD V1 **-- D7LDR4_ARALY); contains Interpro domain(s) IPR004159 Protein of unknown function DUF248, methyltransferase putative
Solyc04g064610	RAG1-activating protein 1 homolog (AHRD V1 **-- R1AP1_DROPS); contains Interpro domain(s) IPR018179 RAG1-activating protein 1 homologue
Solyc04g071340	Fructose-1 6-bisphosphatase class 1 (AHRD V1 **** D3PE46_DEFDS); contains Interpro domain(s) IPR000146 Fructose-1,6-bisphosphatase
Solyc04g076340	Unknown Protein (AHRD V1)
Solyc04g076550	Genomic DNA chromosome 5 TAC clone K2I5 (AHRD V1 **-- Q9LTA5_ARATH)
Solyc04g077010	Receptor like kinase, RLK
Solyc04g082270	CM0216.210.nc protein (AHRD V1 ***- B0BLH4_LOTJA); contains Interpro domain(s) IPR004320 Protein of unknown function DUF241, plant
Solyc05g014500	Multidrug resistance protein ABC transporter family (AHRD V1 **-- B9HTC0_POPTR)
Solyc05g023820	SAM domain family protein (AHRD V1 **-- B6TSE6_MAIZE); contains Interpro domain(s) IPR001660 Sterile alpha motif SAM
Solyc05g046390	Unknown Protein (AHRD V1)
Solyc05g055730	Methylenetetrahydrofolate reductase (AHRD V1 **** A5ATB7_VITVI); contains Interpro domain(s) IPR004621 Eukaryotic-type methylenetetrahydrofolate reductase
Solyc06g010220	Chromodomain helicase DNA binding protein 3 (Fragment) (AHRD V1 *--- B1AR16_MOUSE); contains Interpro domain(s) IPR019787 Zinc finger, PHD-finger
Solyc06g024210	TO54-2 (Fragment) (AHRD V1 *-*- Q3LVL5_TAROF)
Solyc06g036290	Heat shock protein 90 (Fragment) (AHRD V1 **-- Q00NU9_WHEAT); contains Interpro domain(s) IPR003594 ATP-binding region, ATPase-like IPR001404 Heat shock protein Hsp90
Solyc06g066300	Diphthamide biosynthesis protein 1 (AHRD V1 ***- B6TW72_MAIZE); contains Interpro domain(s) IPR016435 Diphthamide synthesis, DHP1
Solyc06g069510	Genomic DNA chromosome 5 P1 clone MXM12 (AHRD V1 ***- Q9SD89_ARATH)
Solyc06g071990	AAA-type ATPase family protein (AHRD V1 *-*- D7MGM1_ARALY)
Solyc06g072430	Bcl-2-associated athanogene-like protein (AHRD V1 *-*- D1MIX4_VITVI); contains Interpro domain(s) IPR003103 Apoptosis regulator Bcl-2 protein, BAG
Solyc06g074000	Aspartic proteinase nepenthesin-2 (AHRD V1 **-- B6SJT4_MAIZE); contains Interpro domain(s) IPR001461 Peptidase A1
Solyc06g074150	LRR receptor-like serine/threonine-protein kinase, RLP
Solyc06g074540	Phytosulfokines 5 (AHRD V1 *-*- PSK5_ORYSJ); contains Interpro domain(s) IPR009438 Phytosulfokine
Solyc06g076020	heat shock protein (AHRD V1 ***- B2D2G5_CAPSN); contains Interpro domain(s) IPR013126 Heat shock protein 70
Solyc07g006040	Unknown Protein (AHRD V1)
Solyc07g006570	S8-RNase (Fragment) (AHRD V1 **-- Q5XPJ2_MALDO); contains Interpro domain(s) IPR001568 Ribonuclease T2
Solyc07g008090	WD repeat-containing protein 11 (AHRD V1 **-- WDR11_HUMAN); contains Interpro domain(s) IPR011046 WD40 repeat-like
Solyc07g041920	Cathepsin L-like cysteine proteinase (AHRD V1 **-* A7LJ78_DERVA); contains Interpro domain(s) IPR013128 Peptidase C1A, papain
Solyc07g047940	Zinc finger CCCH domain-containing protein 18 (AHRD V1 ***- C3H18_ARATH); contains Interpro domain(s) IPR000504 RNA recognition motif, RNP-1
Solyc07g052310	Unknown Protein (AHRD V1)
Solyc07g054280	Aromatic amino acid decarboxylase (AHRD V1 **** D4NUX2_CIMRA); contains Interpro domain(s) IPR010977 Aromatic-L-amino-acid decarboxylase
Solyc07g054900	Alpha-hydroxynitrile lyase (AHRD V1 **-- O49897_MANES); contains Interpro domain(s) IPR000073 Alpha/beta hydrolase fold-1
Solyc08g014430	Formin 3 (AHRD V1 *-*- D0QAN4_ARATH); contains Interpro domain(s) IPR015425 Actin-binding FH2
Solyc08g062960	Heat stress transcription factor A3 (AHRD V1 *-** D1M7W9_SOLLC); contains Interpro domain(s) IPR000232 Heat shock factor (HSF)-type, DNA-binding
Solyc08g066810	Glycosyl hydrolase family 5 protein/cellulase (AHRD V1 **-- A8NVS8_COPC7); contains Interpro domain(s) IPR001547 Glycoside hydrolase, family 5
Solyc08g076340	40S ribosomal protein S30-like (AHRD V1 ***- Q6K853_ORYSJ); contains Interpro domain(s) IPR006846 Ribosomal protein S30
Solyc08g079250	Lipid transfer protein (AHRD V1 *-** O22110_PICAB); contains Interpro domain(s) IPR003612 Plant lipid transfer protein/seed storage/trypsin-alpha amylase inhibitor
Solyc08g079700	Zinc finger A20 and AN1 domain-containing stress-associated protein 7 (AHRD V1 ***- SAP7_ARATH); contains Interpro domain(s) IPR000058 Zinc finger, AN1-type
Solyc08g080040	Anthocyanidin synthase (AHRD V1 ***- D3XFG1_THECC); contains Interpro domain(s) IPR005123 Oxoglutarate and iron-dependent oxygenase
Solyc08g080540	Heat stress transcription factor (AHRD V1 *-** D4QAU8_CARPA); contains Interpro domain(s) IPR000232 Heat shock factor (HSF)-type, DNA-binding
Solyc09g007390	Mitochondrial import inner membrane translocase subunit TIM14 (AHRD V1 ***- B6TQ49_MAIZE); contains Interpro domain(s) IPR001623 Heat shock protein DnaJ, N-terminal
Solyc09g011710	class I heat shock protein 3 (AHRD V1 ***- B4F976_MAIZE); contains Interpro domain(s) IPR008978 HSP20-like chaperone
Solyc09g064380	TPR Domain containing protein expressed (AHRD V1 **-- Q10CT3_ORYSJ)
Solyc09g066000	Prenylated rab acceptor PRA1 (AHRD V1 ***- A2Q469_MEDTR); contains Interpro domain(s) IPR004895 Prenylated rab acceptor PRA1
Solyc09g075230	POT family domain containing protein expressed (AHRD V1 ***- D8L9H8_WHEAT); contains Interpro domain(s) IPR007493 Protein of unknown function DUF538
Solyc09g075470	Chaperone protein dnaJ (AHRD V1 ***- B6U761_MAIZE); contains Interpro domain(s) IPR001623 Heat shock protein DnaJ, N-terminal
Solyc09g082150	Unknown Protein (AHRD V1)
Solyc09g082620	EPIDERMAL PATTERNING FACTOR-like protein 4 (AHRD V1 *--- EPFL4_ARATH)
Solyc09g084450	Chymotrypsin inhibitor-2 (AHRD V1 *-*- A8V3P8_HORVD); contains Interpro domain(s) IPR000864 Proteinase inhibitor I13, potato inhibitor I
Solyc09g090020	Germin-like protein 5 (AHRD V1 ***- A8QK91_VITVI); contains Interpro domain(s) IPR014710 RmlC-like jelly roll fold
Solyc09g090040	Germin-like protein 5 (AHRD V1 ***- A8QK91_VITVI); contains Interpro domain(s) IPR014710 RmlC-like jelly roll fold
Solyc10g006600	Thermoresistant gluconokinase (Gluconate kinase) (AHRD V1 **** B0VKT5_ACIBS); contains Interpro domain(s) IPR000623 Shikimate kinase
Solyc10g044900	CASTOR protein (Fragment) (AHRD V1 ***- Q1A3R7_SOYBN)
Solyc10g045180	Cytokinesis negative regulator RCP1 (AHRD V1 ***- Q002B3_TOBAC)
Solyc10g048030	Major latex-like protein (AHRD V1 **-- B5THI3_PANGI); contains Interpro domain(s) IPR000916 Bet v I allergen
Solyc10g074920	Mannan endo-1 4-beta-mannosidase (AHRD V1 ***- B4ADW3_BACPU); contains Interpro domain(s) IPR001547 Glycoside hydrolase, family 5
Solyc10g079640	Iaa-amino acid hydrolase 9 (AHRD V1 ***- B9GU29_POPTR); contains Interpro domain(s) IPR010168 Peptidase M20D, amidohydrolase
Solyc10g081560	Tropinone reductase I (AHRD V1 **-- Q9AR59_SOLTU); contains Interpro domain(s) IPR002347 Glucose/ribitol dehydrogenase
Solyc11g011310	Rhamnogalacturonate lyase (AHRD V1 ***- A3XLZ2_LEEBM); contains Interpro domain(s) IPR010325 Rhamnogalacturonate lyase
Solyc11g012240	Wax synthase isoform 3 (AHRD V1 **-- Q84XY7_VITVI)
Solyc11g022590	Kunitz trypsin inhibitor 4 (Fragment) (AHRD V1 **** C1J5E0_POPBA); contains Interpro domain(s) IPR002160 Proteinase inhibitor I3, Kunitz legume
Solyc11g039980	ATP synthase subunit alpha (AHRD V1 ***- Q5M9V4_TOBAC); contains Interpro domain(s) IPR018118 ATPase, F1/A1 complex, alpha/beta subunit, N-terminal
Solyc11g056360	30S ribosomal protein S12 (AHRD V1 ***- C8PSU8_9SPIO); contains Interpro domain(s) IPR005679 Ribosomal protein S12, bacterial-type
Solyc11g069540	Solute carrier family 35 member E3 (AHRD V1 **-- S35E3_DANRE); contains Interpro domain(s) IPR004853 Protein of unknown function DUF250
Solyc11g071830	Chaperone protein dnaj (AHRD V1 ***- Q17AX7_AEDAE); contains Interpro domain(s) IPR003095 Heat shock protein DnaJ
Solyc11g072430	RNA ligase isoform 2 (Fragment) (AHRD V1 *-*- Q0WZC1_WHEAT)
Solyc11g073240	Transmembrane protein 14C (AHRD V1 *-*- Q09JH3_ARGMO); contains Interpro domain(s) IPR005349 Uncharacterised protein family UPF0136, Transmembrane
Solyc12g005150	Pollen ole e 1 allergen and extensin family protein (AHRD V1 ***- D7MUX1_ARALY); contains Interpro domain(s) IPR006041 Pollen Ole e 1 allergen and extensin
Solyc12g008700	40S ribosomal protein S30-like (AHRD V1 ***- Q6K853_ORYSJ); contains Interpro domain(s) IPR006846 Ribosomal protein S30
Solyc12g010340	Pre-mRNA-splicing factor ini1 (AHRD V1 **-- B9T1J2_RICCO); contains Interpro domain(s) IPR005345 PHF5-like
Solyc12g010450	Protein phosphatase 2C (AHRD V1 ***- B4FDN2_MAIZE); contains Interpro domain(s) IPR015655 Protein phosphatase 2C
Solyc12g036670	Glutamate/malate translocator (AHRD V1 *-*- Q8L7Z8_TOBAC)
Solyc12g087960	Unknown Protein (AHRD V1)

## Sheet: all meristems
geneID	functional annotation
Solyc00g009040	Polyadenylate-binding protein 2 (AHRD V1 **** B6U4M0_MAIZE); contains Interpro domain(s) IPR006515 Polyadenylate binding protein, human types 1, 2, 3, 4
Solyc00g044350	EPIDERMAL PATTERNING FACTOR-like protein 1 (AHRD V1 ***- EPFL1_ARATH)
Solyc00g102000	Unknown Protein (AHRD V1)
Solyc00g156980	Choline dehydrogenase (AHRD V1 **-- A5L8M4_9GAMM); contains Interpro domain(s) IPR008671 Lycopene beta and epsilon cyclase
Solyc00g171810	ATP synthase subunit a (AHRD V1 ***- Q45KQ5_CAPAN); contains Interpro domain(s) IPR000568 ATPase, F0 complex, subunit A
Solyc00g244300	Unknown Protein (AHRD V1)
Solyc01g005010	Protein XRI1 (AHRD V1 *-*- XRI1_ARATH)
Solyc01g005130	Zinc finger protein 7 (AHRD V1 ***- B6U8J3_MAIZE); contains Interpro domain(s) IPR007087 Zinc finger, C2H2-type
Solyc01g005300	Flavin-binding kelch domain F box protein (AHRD V1 **-* D7KVS5_ARALY); contains Interpro domain(s) IPR015915 Kelch-type beta propeller
Solyc01g006690	Unknown Protein (AHRD V1)
Solyc01g006930	Nuclear transcription factor Y subunit A-2 (AHRD V1 **** B6SM21_MAIZE); contains Interpro domain(s) IPR001289 CCAAT-binding transcription factor, subunit B
Solyc01g008080	Ribosomal protein S27 (AHRD V1 ***- Q3HVK9_SOLTU); contains Interpro domain(s) IPR000592 Ribosomal protein S27e
Solyc01g010130	Transcription factor (AHRD V1 *-** D6MKM4_9ASPA); contains Interpro domain(s) IPR011598 Helix-loop-helix DNA-binding
Solyc01g010150	Unknown protein DS12 from 2D-PAGE of leaf, chloroplastic (AHRD V1 *--- UP12_ORYSJ); contains Interpro domain(s) IPR002912 Amino acid-binding ACT
Solyc01g010180	Unknown Protein (AHRD V1)
Solyc01g010970	ARGONAUTE 1 (AHRD V1 ***- D6RUV9_TOBAC); contains Interpro domain(s) IPR003165 Stem cell self-renewal protein Piwi
Solyc01g017050	PG1 protein (Fragment) (AHRD V1 --*- D0EZ76_BACAM)
Solyc01g058030	Gibberellin 2-oxidase (AHRD V1 **** A4GVL5_SOLLC); contains Interpro domain(s) IPR005123 Oxoglutarate and iron-dependent oxygenase
Solyc01g066720	Hypoxia induced protein conserved region containing protein (AHRD V1 ***- B6UCX6_MAIZE); contains Interpro domain(s) IPR007667 Hypoxia induced protein conserved region
Solyc01g067510	Receptor-like kinase (AHRD V1 **** A7VM36_MARPO); contains Interpro domain(s) IPR002290 Serine/threonine protein kinase
Solyc01g067540	Ethylene responsive transcription factor 12 (AHRD V1 *-*- C0J9I3_9ROSA); contains Interpro domain(s) IPR001471 Pathogenesis-related transcriptional factor and ERF, DNA-binding
Solyc01g067610	Unknown Protein (AHRD V1)
Solyc01g068400	Tubulin-specific chaperone A (AHRD V1 **** C1C4Y4_RANCA); contains Interpro domain(s) IPR004226 Tubulin binding cofactor A
Solyc01g074030	Beta-glucosidase 01 (AHRD V1 ***- B5M9E4_SOLLC); contains Interpro domain(s) IPR013781 Glycoside hydrolase, subgroup, catalytic core
Solyc01g079170	Galactinol synthase (AHRD V1 ***- D6QSF5_BRANA); contains Interpro domain(s) IPR002495 Glycosyl transferase, family 8
Solyc01g079740	Unknown Protein (AHRD V1)
Solyc01g080380	S-adenosylmethionine decarboxylase proenzyme (AHRD V1 **** Q7XZQ9_VITVI); contains Interpro domain(s) IPR001985 S-adenosylmethionine decarboxylase
Solyc01g080580	Inosine-uridine preferring nucleoside hydrolase family protein (AHRD V1 **** D7LYI5_ARALY); contains Interpro domain(s) IPR001910 Inosine/uridine-preferring nucleoside hydrolase
Solyc01g080770	Receptor like kinase, RLK
Solyc01g080960	AT-hook DNA-binding protein (Fragment) (AHRD V1 *--* A1DR79_CATRO); contains Interpro domain(s) IPR014476 Predicted AT-hook DNA-binding
Solyc01g087050	Zinc finger-like protein (AHRD V1 **-- Q9LT33_ARATH); contains Interpro domain(s) IPR007087 Zinc finger, C2H2-type
Solyc01g087570	Unknown Protein (AHRD V1)
Solyc01g088400	CER1 (AHRD V1 **-- B6TFH3_MAIZE); contains Interpro domain(s) IPR006694 Fatty acid hydroxylase
Solyc01g088430	CER1 (AHRD V1 **-- B6TFH3_MAIZE); contains Interpro domain(s) IPR006694 Fatty acid hydroxylase
Solyc01g088450	RING finger-like (AHRD V1 *-*- Q5Z5F8_ORYSJ); contains Interpro domain(s) IPR018957 Zinc finger, C3HC4 RING-type
Solyc01g088780	Rho-related GTP-binding protein RhoC (AHRD V1 **-- RHOC_PONAB); contains Interpro domain(s) IPR003578 Ras small GTPase, Rho type
Solyc01g090730	Squamosa promoter binding protein 1 (AHRD V1 *-*- Q1MU24_PHYPA); contains Interpro domain(s) IPR004333 Transcription factor, SBP-box
Solyc01g091030	Auxin-responsive family protein (AHRD V1 ***- D7LRT5_ARALY); contains Interpro domain(s) IPR003676 Auxin responsive SAUR protein
Solyc01g091170	Agmatinase (AHRD V1 ***- Q1IPT1_ACIBL); contains Interpro domain(s) IPR016160 Aldehyde dehydrogenase, conserved site IPR006035 Ureohydrolase
Solyc01g091260	AT2G45380 protein (Fragment) (AHRD V1 *-*- B9DGW8_ARATH)
Solyc01g091400	LOB domain protein 31 (AHRD V1 *-*- D7M5R7_ARALY); contains Interpro domain(s) IPR004883 Lateral organ boundaries, LOB
Solyc01g091420	LOB domain protein 30 (AHRD V1 ***- D7M5R6_ARALY); contains Interpro domain(s) IPR004883 Lateral organ boundaries, LOB
Solyc01g091770	Ring H2 finger protein (AHRD V1 *-*- D9ZHD8_HYPPE); contains Interpro domain(s) IPR018957 Zinc finger, C3HC4 RING-type
Solyc01g092950	MADS-box transcription factor 2 (AHRD V1 **** D1MFS7_HEVBR); contains Interpro domain(s) IPR002487 Transcription factor, K-box
Solyc01g094970	Glycoside hydrolase family 28 protein/polygalacturonase family protein (AHRD V1 **-- Q1PF10_ARATH); contains Interpro domain(s) IPR012334 Pectin lyase fold
Solyc01g095530	Unknown Protein (AHRD V1)
Solyc01g095960	Diacylglycerol O-acyltransferase (AHRD V1 ***- A5UW30_ROSS1); contains Interpro domain(s) IPR009721 Protein of unknown function DUF1298
Solyc01g096070	Auxin response factor 9 (AHRD V1 **** D7R605_SOLLC); contains Interpro domain(s) IPR010525 Auxin response factor
Solyc01g096090	Fiber protein Fb11 (AHRD V1 ***- Q8GT82_GOSBA)
Solyc01g096270	Unknown Protein (AHRD V1)
Solyc01g096280	Cytochrome P450
Solyc01g096410	Phosphatidylinositol-4-phosphate 5-kinase family protein (AHRD V1 ***- D7L735_ARALY); contains Interpro domain(s) IPR017163 Phosphatidylinositol-4-phosphate 5-kinase, plant
Solyc01g096880	Nitrate transporter (AHRD V1 **** Q9SZY4_ARATH); contains Interpro domain(s) IPR000109 TGF-beta receptor, type I/II extracellular region
Solyc01g098240	RNA polymerase Rpb1 C-terminal repeat domain-containing protein (AHRD V1 *--- C5GU31_AJEDR); contains Interpro domain(s) IPR012474 Frigida-like
Solyc01g098400	Histidine phosphotransfer protein (AHRD V1 **** B9I823_POPTR); contains Interpro domain(s) IPR008207 Signal transduction histidine kinase, phosphotransfer (Hpt) region
Solyc01g099970	F-box/LRR-repeat protein 14 (AHRD V1 *-*- B5X325_SALSA); contains Interpro domain(s) IPR006553 Leucine-rich repeat, cysteine-containing subtype
Solyc01g099980	Glycine-rich protein (AHRD V1 *--- D7M9Z2_ARALY); contains Interpro domain(s) IPR009836 Protein of unknown function DUF1399
Solyc01g100230	Chaperone protein dnaJ (AHRD V1 ***- B6U761_MAIZE); contains Interpro domain(s) IPR001623 Heat shock protein DnaJ, N-terminal
Solyc01g100370	Universal stress protein (AHRD V1 ***- B6SNQ1_MAIZE); contains Interpro domain(s) IPR006016 UspA
Solyc01g100620	Non-histone chromosomal protein 6 (AHRD V1 *-*- NHP6_CRYNE); contains Interpro domain(s) IPR000910 High mobility group, HMG1/HMG2
Solyc01g102710	Receptor like kinase, RLK
Solyc01g103530	Receptor like kinase, RLK
Solyc01g104030	Inward rectifier potassium channel-like protein (Fragment) (AHRD V1 *-** Q1W7D1_SOLLC); contains Interpro domain(s) IPR000595 Cyclic nucleotide-binding
Solyc01g104740	Multiprotein bridging factor 1 (AHRD V1 ***- C8C4P8_WHEAT); contains Interpro domain(s) IPR013729 Multiprotein bridging factor 1, N-terminal
Solyc01g105050	Chlorophyll a-b binding protein, chloroplastic (AHRD V1 **** CB12_PETHY); contains Interpro domain(s) IPR001344 Chlorophyll A-B binding protein
Solyc01g105450	ABC transporter G family member 11 (AHRD V1 ***- AB11G_ARATH); contains Interpro domain(s) IPR013525 ABC-2 type transporter
Solyc01g105800	MADS box transcription factor (AHRD V1 **-- Q2NNB9_ELAGV); contains Interpro domain(s) IPR002100 Transcription factor, MADS-box
Solyc01g106060	Glutamine amidotransferase class-I (AHRD V1 **-- A2Q1P2_MEDTR); contains Interpro domain(s) IPR000991 Glutamine amidotransferase class-I, C-terminal
Solyc01g106660	Ulp1 protease family C-terminal catalytic domain containing protein (AHRD V1 *-*- Q60D46_SOLDE); contains Interpro domain(s) IPR015410 Region of unknown function DUF1985
Solyc01g107430	Zinc finger protein 7 (AHRD V1 ***- B6U599_MAIZE); contains Interpro domain(s) IPR007087 Zinc finger, C2H2-type
Solyc01g107890	Filament-like plant protein (Fragment) (AHRD V1 *-*- FPP_SOLLC); contains Interpro domain(s) IPR008587 Protein of unknown function DUF869, plant
Solyc01g108020	Thioredoxin m (AHRD V1 ***- B9HS17_POPTR); contains Interpro domain(s) IPR015467 Thioredoxin, core
Solyc01g108210	Cytochrome P450
Solyc01g108320	Peroxidase (AHRD V1 ***- Q43004_ORYSJ); contains Interpro domain(s) IPR002016 Haem peroxidase, plant/fungal/bacterial
Solyc01g108630	Nitrite reductase (AHRD V1 ***- Q76KB0_TOBAC); contains Interpro domain(s) IPR006067 Nitrite and sulphite reductase 4Fe-4S region
Solyc01g111070	Chalcone synthase family protein (AHRD V1 ***- Q460V0_ARATH); contains Interpro domain(s) IPR011141 Polyketide synthase, type III
Solyc01g111170	Peptidyl-prolyl cis-trans isomerase (AHRD V1 ***- Q9XF12_SOLTU); contains Interpro domain(s) IPR002130 Peptidyl-prolyl cis-trans isomerase, cyclophilin-type
Solyc01g111280	Cold shock protein-1 (AHRD V1 *-*- Q8LPA7_WHEAT); contains Interpro domain(s) IPR002059 Cold-shock protein, DNA-binding
Solyc01g111600	Metal ion binding protein (AHRD V1 **-* D7MN12_ARALY); contains Interpro domain(s) IPR006121 Heavy metal transport/detoxification protein
Solyc01g111640	Skp1 (AHRD V1 ***- Q49HP3_CAPAN); contains Interpro domain(s) IPR016897 E3 ubiquitin ligase, SCF complex, Skp subunit
Solyc02g021250	Unknown Protein (AHRD V1)
Solyc02g021400	40S ribosomal protein S28 (AHRD V1 ***- B6T1V2_MAIZE); contains Interpro domain(s) IPR000289 Ribosomal protein S28e
Solyc02g031710	Protein binding protein (AHRD V1 **-- D7L0L7_ARALY); contains Interpro domain(s) IPR001841 Zinc finger, RING-type
Solyc02g032860	Phosphoadenosine phosphosulfate reductase (AHRD V1 *-** A6EX37_9ALTE); contains Interpro domain(s) IPR004508 Thioredoxin-independent 5'-adenylylsulphate reductase
Solyc02g062340	Fructose-bisphosphate aldolase (AHRD V1 ***- Q9SXX4_NICPA); contains Interpro domain(s) IPR000741 Fructose-bisphosphate aldolase, class-I
Solyc02g062510	Peroxidase (AHRD V1 ***- Q0ZA68_9ROSI); contains Interpro domain(s) IPR002016 Haem peroxidase, plant/fungal/bacterial
Solyc02g062760	GATA transcription factor 19 (AHRD V1 *-** B6TS85_MAIZE); contains Interpro domain(s) IPR000679 Zinc finger, GATA-type
Solyc02g063380	Unknown Protein (AHRD V1)
Solyc02g064690	Acetyltransferase-like protein (AHRD V1 ***- Q7EYF5_ORYSJ); contains Interpro domain(s) IPR000182 GCN5-related N-acetyltransferase
Solyc02g064800	Histone-binding protein RBBP7 (AHRD V1 *--* RBBP7_BOVIN); contains Interpro domain(s) IPR017986 WD40 repeat, region
Solyc02g064940	LRR receptor-like serine/threonine-protein kinase, RLP
Solyc02g064960	AP2-like ethylene-responsive transcription factor At1g16060 (AHRD V1 *-*- AP2L1_ARATH); contains Interpro domain(s) IPR001471 Pathogenesis-related transcriptional factor and ERF, DNA-binding
Solyc02g065780	Unknown Protein (AHRD V1)
Solyc02g067440	Cupin RmlC-type (AHRD V1 **-- B4F886_MAIZE); contains Interpro domain(s) IPR012864 Protein of unknown function DUF1637
Solyc02g068030	Unknown Protein (AHRD V1)
Solyc02g068110	Enhancer of yellow 2 transcription factor homolog (AHRD V1 **** C1BWN3_ESOLU); contains Interpro domain(s) IPR018783 Transcription factor, enhancer of yellow 2
Solyc02g068830	Receptor like kinase, RLK
Solyc02g069050	Genomic DNA chromosome 5 P1 clone MFC19 (AHRD V1 ***- Q9FHI2_ARATH); contains Interpro domain(s) IPR007658 Protein of unknown function DUF594
Solyc02g069390	Sh4 homologue protein (AHRD V1 *-*- B6ZKM0_9POAL); contains Interpro domain(s) IPR017877 MYB-like
Solyc02g069430	Phospholipid-transporting ATPase (AHRD V1 **** C1HB29_PARBA); contains Interpro domain(s) IPR001757 ATPase, P-type, K/Mg/Cd/Cu/Zn/Na/Ca/Na/H-transporter
Solyc02g069800	CXE carboxylesterase (AHRD V1 **-- Q0ZPU6_ACTCH); contains Interpro domain(s) IPR013094 Alpha/beta hydrolase fold-3
Solyc02g069810	Unknown Protein (AHRD V1); contains Interpro domain(s) IPR001025 Bromo adjacent region
Solyc02g070470	Unknown Protein (AHRD V1)
Solyc02g070890	Receptor like kinase, RLK
Solyc02g070940	Chlorophyll a/b binding protein (AHRD V1 **** Q41422_SOLTU); contains Interpro domain(s) IPR001344 Chlorophyll A-B binding protein
Solyc02g070950	Chlorophyll a/b binding protein (AHRD V1 **** Q41422_SOLTU); contains Interpro domain(s) IPR001344 Chlorophyll A-B binding protein
Solyc02g070970	Chlorophyll a/b binding protein (AHRD V1 **** Q41422_SOLTU); contains Interpro domain(s) IPR001344 Chlorophyll A-B binding protein
Solyc02g071010	Chlorophyll a/b binding protein (AHRD V1 **** Q41422_SOLTU); contains Interpro domain(s) IPR001344 Chlorophyll A-B binding protein
Solyc02g071030	Chlorophyll a/b binding protein (AHRD V1 **** Q41422_SOLTU); contains Interpro domain(s) IPR001344 Chlorophyll A-B binding protein
Solyc02g071060	Purine permease family protein (AHRD V1 **-* D7MCV2_ARALY); contains Interpro domain(s) IPR004853 Protein of unknown function DUF250
Solyc02g071940	Unknown Protein (AHRD V1)
Solyc02g072440	Receptor like kinase, RLK
Solyc02g077110	Lipase-like protein (AHRD V1 ***- Q8LF19_ARATH); contains Interpro domain(s) IPR002921 Lipase, class 3
Solyc02g077240	Pyruvate decarboxylase (AHRD V1 **** Q1I1D9_CITSI); contains Interpro domain(s) IPR012110 Pyruvate decarboxylase/indolepyruvate decarboxylase
Solyc02g077390	WUSCHEL-related homeobox 11 (AHRD V1 *-*- B6SN57_MAIZE); contains Interpro domain(s) IPR001356 Homeobox
Solyc02g077440	Transcription elongation factor 1 homolog (AHRD V1 **** C1C367_9MAXI); contains Interpro domain(s) IPR007808 Protein of unknown function DUF701, zinc-binding putative
Solyc02g079140	Heterogeneous nuclear ribonucleoprotein U-like protein 1 (AHRD V1 *-*- B6UCI9_MAIZE); contains Interpro domain(s) IPR018355 SPla/RYanodine receptor subgroup
Solyc02g079340	Unknown Protein (AHRD V1)
Solyc02g079570	Serine/threonine-protein kinase receptor (AHRD V1 **** B6U2B7_MAIZE); contains Interpro domain(s) IPR002290 Serine/threonine protein kinase
Solyc02g080210	Pectinesterase (AHRD V1 ***- B9RXQ4_RICCO); contains Interpro domain(s) IPR000070 Pectinesterase, catalytic
Solyc02g080640	Phosphoadenosine phosphosulfate reductase (AHRD V1 *-** B7I7M3_ACIB5); contains Interpro domain(s) IPR013766 Thioredoxin domain
Solyc02g080790	Deoxyhypusine synthase (AHRD V1 ***- Q5ZN61_9ASTE); contains Interpro domain(s) IPR002773 Deoxyhypusine synthase
Solyc02g081340	Glutathione S-transferase (AHRD V1 **** O24261_PETHY); contains Interpro domain(s) IPR004046 Glutathione S-transferase, C-terminal
Solyc02g081390	Amine oxidase family protein (AHRD V1 **** Q1EPI3_MUSAC); contains Interpro domain(s) IPR002937 Amine oxidase
Solyc02g081670	Fimbriata (Fragment) (AHRD V1 **-- Q6QVW9_MIMLE); contains Interpro domain(s) IPR001810 Cyclin-like F-box
Solyc02g081830	HAD-superfamily hydrolase (AHRD V1 ***- D5A3P4_SPIPL); contains Interpro domain(s) IPR011949 HAD-superfamily hydrolase, subfamily IA, REG-2-like
Solyc02g082420	Ring finger protein (AHRD V1 *-*- O49869_HORVU); contains Interpro domain(s) IPR018957 Zinc finger, C3HC4 RING-type
Solyc02g082850	Serine O-acetyltransferase (AHRD V1 **** Q21LT3_SACD2); contains Interpro domain(s) IPR005881 Serine O-acetyltransferase
Solyc02g083520	BZIP transcription factor (AHRD V1 *-** Q32WR6_MALDO); contains Interpro domain(s) IPR011616 bZIP transcription factor, bZIP-1
Solyc02g083720	MLO-like protein 4 (AHRD V1 ***- B6TXU3_MAIZE); contains Interpro domain(s) IPR004326 Mlo-related protein
Solyc02g084210	GDP-mannose 4 6-dehydratase (AHRD V1 **** B7XH28_NICBE); contains Interpro domain(s) IPR006368 GDP-mannose 4,6-dehydratase
Solyc02g084540	DUF726 domain-containing protein (AHRD V1 ***- C5GEI0_AJEDR); contains Interpro domain(s) IPR007941 Protein of unknown function DUF726
Solyc02g084790	Peroxidase (AHRD V1 ***- Q0ZA68_9ROSI); contains Interpro domain(s) IPR002016 Haem peroxidase, plant/fungal/bacterial
Solyc02g084950	Carboxyl methyltransferase 4 (AHRD V1 **** B0ZB58_HUMLU); contains Interpro domain(s) IPR005299 SAM dependent carboxyl methyltransferase
Solyc02g085020	Dihydroflavonol 4-reductase (AHRD V1 **** Q6WG03_SOLTU); contains Interpro domain(s) IPR016040 NAD(P)-binding domain
Solyc02g085490	Os12g0581300 protein (Fragment) (AHRD V1 *-*- Q0IMB2_ORYSJ); contains Interpro domain(s) IPR006873 Protein of unknown function DUF620
Solyc02g085500	Ovate protein (AHRD V1 ***- Q8GSM4_SOLLC)
Solyc02g085590	Vicilin (Fragment) (AHRD V1 *--- B4X640_PISVE); contains Interpro domain(s) IPR011051 Cupin, RmlC-type
Solyc02g085600	GRAS family transcription factor (AHRD V1 **-* B9HET8_POPTR); contains Interpro domain(s) IPR005202 GRAS transcription factor
Solyc02g086320	HEAT repeat-containing protein-like (AHRD V1 ***- Q5QMW8_ORYSJ)
Solyc02g086770	Cinnamoyl CoA reductase-like protein (AHRD V1 **** Q9LYJ0_ARATH); contains Interpro domain(s) IPR002225 3-beta hydroxysteroid dehydrogenase/isomerase
Solyc02g086780	Unknown Protein (AHRD V1); contains Interpro domain(s) IPR018788 Proteasome assembly chaperone 3
Solyc02g087670	Pectate lyase family protein (AHRD V1 **** D7M6R5_ARALY); contains Interpro domain(s) IPR002022 Pectate lyase/Amb allergen
Solyc02g087740	Cupin RmlC-type (AHRD V1 **-- B4F886_MAIZE); contains Interpro domain(s) IPR012864 Protein of unknown function DUF1637
Solyc02g088190	MYB transcription factor (AHRD V1 *-** Q6R098_ARATH); contains Interpro domain(s) IPR015495 Myb transcription factor
Solyc02g088560	Cyclic nucleotide gated channel (AHRD V1 **** A9CRE4_MALDO); contains Interpro domain(s) IPR000595 Cyclic nucleotide-binding
Solyc02g089200	MADS-box transcription factor (AHRD V1 **** Q3KSZ0_PRUDU); contains Interpro domain(s) IPR002100 Transcription factor, MADS-box IPR002487 Transcription factor, K-box
Solyc02g089210	MADS box transcription factor (AHRD V1 ***- Q689E7_GENTR); contains Interpro domain(s) IPR002487 Transcription factor, K-box
Solyc02g089540	Tomato CONSTANS-like 1
Solyc02g089620	Proline dehydrogenase (AHRD V1 **** A1E289_ACTDE); contains Interpro domain(s) IPR015659 Proline oxidase
Solyc02g089850	Coiled-coil domain-containing protein 109A (AHRD V1 **-- C109A_MOUSE); contains Interpro domain(s) IPR006769 Protein of unknown function DUF607
Solyc02g090120	Unknown Protein (AHRD V1)
Solyc02g090300	Cytochrome P450
Solyc02g090340	Cytochrome P450
Solyc02g090540	Short-chain dehydrogenase/reductase family protein (AHRD V1 **** D7LTG0_ARALY); contains Interpro domain(s) IPR002347 Glucose/ribitol dehydrogenase
Solyc02g090960	Rapid alkalinization factor 3 (AHRD V1 ***- Q6TF27_SOLCH); contains Interpro domain(s) IPR008801 Rapid ALkalinization Factor
Solyc02g091500	Calmodulin (AHRD V1 ***- B6TGU5_MAIZE); contains Interpro domain(s) IPR011992 EF-Hand type
Solyc02g091690	BHLH transcription factor (AHRD V1 **-* A9YWR2_MEDTR); contains Interpro domain(s) IPR011598 Helix-loop-helix DNA-binding
Solyc02g091910	EPIDERMAL PATTERNING FACTOR-like protein 2 (AHRD V1 ***- EPFL2_ARATH)
Solyc02g092070	Growth regulating factor 1 (Fragment) (AHRD V1 *--- A6MZS4_ORYSI); contains Interpro domain(s) IPR014977 WRC
Solyc02g092150	ACT domain-containing protein (AHRD V1 **-- D7M3X3_ARALY); contains Interpro domain(s) IPR002912 Amino acid-binding ACT
Solyc02g092240	Os10g0352000 protein (Fragment) (AHRD V1 *-*- Q0IY85_ORYSJ)
Solyc02g092370	GRAS family transcription factor (AHRD V1 **-- B9NAS9_POPTR); contains Interpro domain(s) IPR005202 GRAS transcription factor
Solyc02g092550	LOB domain protein 38 (AHRD V1 ***- D7LT02_ARALY); contains Interpro domain(s) IPR004883 Lateral organ boundaries, LOB
Solyc02g092700	Ycf36 protein (AHRD V1 *-*- D4ZSA0_SPIPL); contains Interpro domain(s) IPR009631 Protein of unknown function DUF1230
Solyc02g093150	AP2-like ethylene-responsive transcription factor At1g16060 (AHRD V1 *-*- AP2L1_ARATH); contains Interpro domain(s) IPR001471 Pathogenesis-related transcriptional factor and ERF, DNA-binding
Solyc02g093270	Caffeoyl-CoA O-methyltransferase (AHRD V1 **** A8IFQ7_SOLLC); contains Interpro domain(s) IPR002935 O-methyltransferase, family 3
Solyc02g093420	NAC domain class transcription factor (AHRD V1 *-** D9ZJ99_MALDO); contains Interpro domain(s) IPR003441 No apical meristem (NAM) protein
Solyc02g093850	Ankyrin repeat domain-containing protein 50 (AHRD V1 *--- B0W609_CULQU); contains Interpro domain(s) IPR002110 Ankyrin
Solyc02g093890	Unknown Protein (AHRD V1)
Solyc02g093910	Kelch repeat-containing protein-like (AHRD V1 ***- Q6ZK44_ORYSJ); contains Interpro domain(s) IPR015915 Kelch-type beta propeller
Solyc03g005760	Chlorophyll a-b binding protein 3C-like (AHRD V1 **** Q2XTE0_SOLTU); contains Interpro domain(s) IPR001344 Chlorophyll A-B binding protein
Solyc03g005960	Receptor like kinase, RLK
Solyc03g006040	DNA binding protein (AHRD V1 ***- B4FLH1_MAIZE)
Solyc03g006590	Unknown Protein (AHRD V1)
Solyc03g006770	Serine/threonine kinase receptor (AHRD V1 **** Q7DMS5_BRANA); contains Interpro domain(s) IPR002290 Serine/threonine protein kinase
Solyc03g006830	MADS-box transcription factor 2 (AHRD V1 **** D1MFS7_HEVBR); contains Interpro domain(s) IPR002100 Transcription factor, MADS-box
Solyc03g006840	Genomic DNA chromosome 5 P1 clone MTG10 (AHRD V1 ***- Q9FIS0_ARATH)
Solyc03g007030	CDGSH iron sulfur domain-containing protein 1 (AHRD V1 ***- B5X1R9_SALSA); contains Interpro domain(s) IPR006622 Iron sulphur domain-containing, CDGSH-type, subfamily
Solyc03g007240	Spermidine synthase 1 (AHRD V1 **** B6TA19_MAIZE); contains Interpro domain(s) IPR001045 Spermine synthase
Solyc03g007530	Multidrug resistance protein ABC transporter family (AHRD V1 **-- B9GX56_POPTR); contains Interpro domain(s) IPR003439 ABC transporter-like
Solyc03g007760	Cell division protease ftsH (AHRD V1 *--- FTSH_SHIFL); contains Interpro domain(s) IPR003959 ATPase, AAA-type, core
Solyc03g007770	C4-dicarboxylate transporter/malic acid transport family protein (AHRD V1 **** D7M2F7_ARALY); contains Interpro domain(s) IPR004695 C4-dicarboxylate transporter/malic acid transport protein
Solyc03g013360	Polyprotein (AHRD V1 ***- Q0ZLH4_9ORYZ); contains Interpro domain(s) IPR005162 Retrotransposon gag protein
Solyc03g019750	Alpha-1 4-glucan-protein synthase (AHRD V1 **-* B9REB8_RICCO); contains Interpro domain(s) IPR004901 Alpha-1,4-glucan-protein synthase, UDP-forming
Solyc03g025190	Multidrug resistance protein mdtK (AHRD V1 **-- MDTK_YERP3); contains Interpro domain(s) IPR002528 Multi antimicrobial extrusion protein MatE
Solyc03g026080	Rhomboid family protein (AHRD V1 **-- D7M0H4_ARALY); contains Interpro domain(s) IPR002610 Peptidase S54, rhomboid
Solyc03g026180	Unknown Protein (AHRD V1)
Solyc03g031830	Zinc finger family protein (AHRD V1 *-*- D7MVE2_ARALY); contains Interpro domain(s) IPR001841 Zinc finger, RING-type
Solyc03g031940	Acyl-CoA synthetase/AMP-acid ligase II (AHRD V1 **** D0C359_9GAMM); contains Interpro domain(s) IPR000873 AMP-dependent synthetase and ligase
Solyc03g033330	RING finger protein 44 (AHRD V1 *-*- RNF44_MOUSE); contains Interpro domain(s) IPR018957 Zinc finger, C3HC4 RING-type
Solyc03g033610	Receptor like kinase, RLK
Solyc03g033680	Short internode related sequence 5 (AHRD V1 -*-- D2KC76_BRARP); contains Interpro domain(s) IPR007818 Protein of unknown function DUF702
Solyc03g033860	Genomic DNA chromosome 5 TAC clone K1F13 (AHRD V1 ***- Q9FJZ5_ARATH)
Solyc03g034070	P-166-4_1 (Fragment) (AHRD V1 *-*- Q4VDD8_PINRE)
Solyc03g034300	Unknown Protein (AHRD V1)
Solyc03g043930	Adiponectin receptor protein 2 (AHRD V1 *-** B0W6M8_CULQU); contains Interpro domain(s) IPR004254 Hly-III related
Solyc03g044090	Phototropic-responsive NPH3 family protein (AHRD V1 **-- D7KEU3_ARALY); contains Interpro domain(s) IPR004249 NPH3
Solyc03g044300	AP2-like ethylene-responsive transcription factor At1g16060 (AHRD V1 *-*- AP2L1_ARATH); contains Interpro domain(s) IPR001471 Pathogenesis-related transcriptional factor and ERF, DNA-binding
Solyc03g044480	Unknown Protein (AHRD V1); contains Interpro domain(s) IPR015456 Cyclin-dependent kinase inhibitor p27
Solyc03g063510	Unknown Protein (AHRD V1)
Solyc03g063550	Unknown Protein (AHRD V1)
Solyc03g080060	Receptor-like kinase (AHRD V1 **** A7VM32_MARPO); contains Interpro domain(s) IPR001220 Legume lectin, beta chain
Solyc03g081260	Subtilisin-like protease-like protein (AHRD V1 **-- Q9T0B5_ARATH); contains Interpro domain(s) IPR015500 Peptidase S8, subtilisin-related
Solyc03g082640	26S protease regulatory subunit 6B homolog (AHRD V1 *--- PRS6B_ENCCU); contains Interpro domain(s) IPR003959 ATPase, AAA-type, core
Solyc03g083620	Unknown Protein (AHRD V1)
Solyc03g083960	Trehalose 6-phosphate phosphatase (AHRD V1 **** D4QAK5_TOBAC); contains Interpro domain(s) IPR003337 Trehalose-phosphatase
Solyc03g093370	Protein DYAD (AHRD V1 ***- DYAD_ARATH)
Solyc03g093800	Unknown Protein (AHRD V1)
Solyc03g095780	Abscisic acid receptor PYL6 (AHRD V1 **-* PYL6_ARATH); contains Interpro domain(s) IPR019587 Polyketide cyclase/dehydrase
Solyc03g096290	Aquaporin-like protein (AHRD V1 ***- Q8W1A9_PETHY); contains Interpro domain(s) IPR012269 Aquaporin
Solyc03g096630	Ethylene insensitive-like protein (AHRD V1 ***- D3YBE3_TRIRP); contains Interpro domain(s) IPR006957 Ethylene insensitive 3
Solyc03g096780	Unknown Protein (AHRD V1)
Solyc03g097150	Inositol-tetrakisphosphate 1-kinase 1 (AHRD V1 **** B6TJ44_MAIZE); contains Interpro domain(s) IPR017427 Inositol-tetrakisphosphate 1-kinase
Solyc03g098710	Kunitz-type proteinase inhibitor A4 (Fragment) (AHRD V1 **** C5IWR3_SOLBR); contains Interpro domain(s) IPR011065 Kunitz inhibitor ST1-like
Solyc03g098720	Kunitz trypsin inhibitor (AHRD V1 ***- Q4W188_POPTN); contains Interpro domain(s) IPR011065 Kunitz inhibitor ST1-like
Solyc03g098780	Kunitz-type protease inhibitor (AHRD V1 **** Q3S488_SOLTU); contains Interpro domain(s) IPR002160 Proteinase inhibitor I3, Kunitz legume
Solyc03g112060	Quinolinate synthase A (AHRD V1 *-*- NADA_CYAP4); contains Interpro domain(s) IPR003808 Fe-S metabolism associated SufE
Solyc03g112160	Protein DEHYDRATION-INDUCED 19 homolog 5 (AHRD V1 ***- DI195_ORYSJ); contains Interpro domain(s) IPR008598 Drought induced 19
Solyc03g112200	Unknown Protein (AHRD V1)
Solyc03g112440	Oleosin (AHRD V1 ***- O04925_SESIN); contains Interpro domain(s) IPR000136 Oleosin
Solyc03g112580	Receptor like kinase, RLK
Solyc03g113490	Hedgehog-interacting protein 1 (Fragment) (AHRD V1 *--- A9J6P8_9ROSI); contains Interpro domain(s) IPR011041 Soluble quinoprotein glucose/sorbosone dehydrogenase
Solyc03g113550	Transcription factor bHLH79 (AHRD V1 *-*- BH079_ARATH)
Solyc03g113560	Transcription factor (AHRD V1 ***- D6MKM4_9ASPA); contains Interpro domain(s) IPR011598 Helix-loop-helix DNA-binding
Solyc03g113620	MYB transcription factor (AHRD V1 **** B2CZJ3_CAPAN); contains Interpro domain(s) IPR006447 Myb-like DNA-binding region, SHAQKYF class
Solyc03g113970	Calmodulin binding protein (AHRD V1 **** B6TKI3_MAIZE); contains Interpro domain(s) IPR012416 Calmodulin binding protein-like
Solyc03g114020	Genomic DNA chromosome 5 P1 clone MQB2 (AHRD V1 **-- Q9FM06_ARATH)
Solyc03g114310	Protein-tyrosine kinase 6 (AHRD V1 **** PTK6_HUMAN); contains Interpro domain(s) IPR002290 Serine/threonine protein kinase
Solyc03g114360	Poly polymerase catalytic domain containing protein expressed (AHRD V1 **-- Q84T80_ORYSJ); contains Interpro domain(s) IPR012317 Poly(ADP-ribose) polymerase, catalytic region
Solyc03g114830	MADS box transcription factor (AHRD V1 ***- Q9SBQ1_PETHY); contains Interpro domain(s) IPR002487 Transcription factor, K-box
Solyc03g114840	MADS box transcription factor 11 (AHRD V1 **** D9IFM5_ONCHC); contains Interpro domain(s) IPR002100 Transcription factor, MADS-box IPR002487 Transcription factor, K-box
Solyc03g115900	Chlorophyll a-b binding protein P4, chloroplastic (AHRD V1 ***- CB24_PEA); contains Interpro domain(s) IPR001344 Chlorophyll A-B binding protein
Solyc03g116320	TCP family transcription factor (AHRD V1 *-*- A6MCZ2_9ORYZ); contains Interpro domain(s) IPR005333 Transcription factor, TCP
Solyc03g116870	Glycosyl transferase family 9 (AHRD V1 ***- A0YHY3_LYNSP)
Solyc03g116900	Manganese transporter MntH (AHRD V1 **-* D3KPZ0_LISMO); contains Interpro domain(s) IPR001046 Natural resistance-associated macrophage protein
Solyc03g117580	Os08g0272000 protein (Fragment) (AHRD V1 ***- Q0J6S6_ORYSJ)
Solyc03g117900	Cytochrome c oxidase assembly protein (AHRD V1 **-- A8JCU9_CHLRE); contains Interpro domain(s) IPR018793 Cytochrome c oxidase assembly protein PET191, N-terminal
Solyc03g119150	Peptidyl-prolyl cis-trans isomerase (AHRD V1 *-*- B4VX45_9CYAN); contains Interpro domain(s) IPR001179 Peptidyl-prolyl cis-trans isomerase, FKBP-type
Solyc03g119530	LOB domain protein 42 (AHRD V1 ***- D7KWD0_ARALY); contains Interpro domain(s) IPR004883 Lateral organ boundaries, LOB
Solyc03g119600	NIMIN2c protein (AHRD V1 ***- A0FJY4_TOBAC)
Solyc03g120620	Homeobox-leucine zipper protein ATHB-15 (AHRD V1 *-*- ATB15_ARATH); contains Interpro domain(s) IPR002913 Lipid-binding START
Solyc03g121170	GDSL esterase/lipase At5g22810 (AHRD V1 ***- GDL78_ARATH); contains Interpro domain(s) IPR001087 Lipase, GDSL
Solyc03g122190	Jasmonate ZIM domain 2 (AHRD V1 **-- C7SCY2_CATRO); contains Interpro domain(s) IPR010399 Tify
Solyc03g122340	Lipoxygenase (AHRD V1 **** Q96574_SOLLC); contains Interpro domain(s) IPR001246 Lipoxygenase, plant
Solyc03g123540	class II heat shock protein (AHRD V1 ***- B6U175_MAIZE); contains Interpro domain(s) IPR002068 Heat shock protein Hsp20
Solyc03g123670	Unknown Protein (AHRD V1)
Solyc04g005910	Receptor like kinase, RLK
Solyc04g006940	Phospholipid-transporting ATPase (AHRD V1 **** C1GDL1_PARBD); contains Interpro domain(s) IPR006539 ATPase, P-type, phospholipid-translocating, flippase
Solyc04g007390	Serine/threonine protein kinase family protein (AHRD V1 **** C6ZRM5_SOYBN); contains Interpro domain(s) IPR002290 Serine/threonine protein kinase
Solyc04g007790	Major latex-like protein (AHRD V1 **-- B5THI3_PANGI); contains Interpro domain(s) IPR000916 Bet v I allergen
Solyc04g007950	Cysteine-rich repeat secretory protein 12 (AHRD V1 ***- CRR12_ARATH); contains Interpro domain(s) IPR002902 Protein of unknown function DUF26
Solyc04g009630	Alpha-glucosidase 1 (AHRD V1 **** O22444_ARATH); contains Interpro domain(s) IPR000322 Glycoside hydrolase, family 31
Solyc04g009900	Calcium-dependent protein kinase 2 (AHRD V1 ***- B4FZS4_MAIZE); contains Interpro domain(s) IPR002290 Serine/threonine protein kinase
Solyc04g010040	RNA-binding protein (AHRD V1 **-- D3TPM8_GLOMM); contains Interpro domain(s) IPR015464 RNA recognition motif-related
Solyc04g010330	Auxin-regulated protein (AHRD V1 *-*- Q945F5_SOLLC); contains Interpro domain(s) IPR010369 Protein of unknown function DUF966
Solyc04g014360	Transcription factor SPATULA (AHRD V1 *-** SPT_ARATH); contains Interpro domain(s) IPR001092 Basic helix-loop-helix dimerisation region bHLH
Solyc04g014540	Zinc finger protein 7 (AHRD V1 ***- B6U8J3_MAIZE); contains Interpro domain(s) IPR007087 Zinc finger, C2H2-type
Solyc04g014600	Universal stress protein family protein (AHRD V1 ***- D7L0F0_ARALY); contains Interpro domain(s) IPR006016 UspA
Solyc04g016430	Cytokinin oxidase/dehydrogenase 1 (AHRD V1 **** C0LPA6_SOLTU); contains Interpro domain(s) IPR015345 Cytokinin dehydrogenase 1, FAD and cytokinin binding
Solyc04g016590	Unknown Protein (AHRD V1)
Solyc04g040220	NPR1-like protein (Fragment) (AHRD V1 ***- Q2QBV6_PYRCO); contains Interpro domain(s) IPR013069 BTB/POZ
Solyc04g045560	Squamosa promoter-binding-like protein 11 (AHRD V1 *-*- B6TF72_MAIZE); contains Interpro domain(s) IPR004333 Transcription factor, SBP-box
Solyc04g049090	MLO-like protein 17 (AHRD V1 ***- C6EWF0_VITVI); contains Interpro domain(s) IPR004326 Mlo-related protein
Solyc04g049190	Unknown Protein (AHRD V1)
Solyc04g049800	AP2-like ethylene-responsive transcription factor At1g79700 (AHRD V1 *--- AP2L3_ARATH); contains Interpro domain(s) IPR001471 Pathogenesis-related transcriptional factor and ERF, DNA-binding
Solyc04g050440	Ammonium transporter (AHRD V1 **** B9IPE2_POPTR); contains Interpro domain(s) IPR001905 Ammonium transporter
Solyc04g050730	GDSL esterase/lipase At5g33370 (AHRD V1 ***- GDL79_ARATH); contains Interpro domain(s) IPR001087 Lipase, GDSL
Solyc04g054990	Lipoxygenase homology domain-containing protein 1 (AHRD V1 *--- LOXH1_HUMAN); contains Interpro domain(s) IPR001024 Lipoxygenase, LH2
Solyc04g055080	Transporter major facilitator family (AHRD V1 ***- B5IUM5_9EURY); contains Interpro domain(s) IPR016196 Major facilitator superfamily, general substrate transporter
Solyc04g058060	30S ribosomal protein S8P (AHRD V1 *-*- RS8_KORCO); contains Interpro domain(s) IPR004314 Protein of unknown function DUF239, plant
Solyc04g064620	RAG1-activating protein 1 homolog (AHRD V1 **-- R1AP1_DROPS); contains Interpro domain(s) IPR018179 RAG1-activating protein 1 homologue
Solyc04g071180	Genomic DNA chromosome 3 P1 clone MGD8 (AHRD V1 ***- Q9LUU1_ARATH); contains Interpro domain(s) IPR008011 Complex 1 LYR protein
Solyc04g071360	Transcription factor (Fragment) (AHRD V1 *--* D6MK04_9ASPA); contains Interpro domain(s) IPR017877 MYB-like
Solyc04g071990	Tomato GIGANTEA 1
Solyc04g074560	Unknown Protein (AHRD V1)
Solyc04g074990	Zinc finger-homeodomain protein 1 (Fragment) (AHRD V1 *--- B0LK17_YUCFI); contains Interpro domain(s) IPR006456 ZF-HD homeobox protein Cys/His-rich dimerisation region
Solyc04g076280	MPF2-like (Fragment) (AHRD V1 ***- A8QYX1_9SOLA); contains Interpro domain(s) IPR002487 Transcription factor, K-box
Solyc04g076480	Serine/threonine-protein kinase B-raf (AHRD V1 *-** BRAF_COTJA); contains Interpro domain(s) IPR002290 Serine/threonine protein kinase
Solyc04g077720	Nucleobase ascorbate transporter (AHRD V1 **-* B9HJR9_POPTR); contains Interpro domain(s) IPR006043 Xanthine/uracil/vitamin C permease
Solyc04g078060	Small hydrophobic protein (AHRD V1 *-*- Q9ZQY8_ARATH)
Solyc04g078140	Cytochrome B5 (AHRD V1 **** Q9ZSP7_PETHY); contains Interpro domain(s) IPR001199 Cytochrome b5
Solyc04g078460	N(4)-(Beta-N-acetylglucosaminyl)-L-asparaginase (AHRD V1 **** ASPG_ELIMR); contains Interpro domain(s) IPR000246 Peptidase T2, asparaginase 2
Solyc04g079700	WD-40 repeat family protein (AHRD V1 **-- Q1EPE0_MUSAC); contains Interpro domain(s) IPR020472 G-protein beta WD-40 repeat, region
Solyc04g079710	Receptor-like kinase (AHRD V1 *-** A7VM25_MARPO); contains Interpro domain(s) IPR002290 Serine/threonine protein kinase
Solyc04g080130	Zinc finger protein (AHRD V1 *-*- Q9LVQ7_ARATH); contains Interpro domain(s) IPR007087 Zinc finger, C2H2-type
Solyc04g080870	Peptidase S16 lon domain protein (AHRD V1 ***- D7E103_NOSA0)
Solyc04g080940	Nodulin-like protein (AHRD V1 ***- Q94AP3_ARATH); contains Interpro domain(s) IPR000620 Protein of unknown function DUF6, transmembrane
Solyc04g080970	Short internode related sequence 5 (AHRD V1 **-- D2KC76_BRARP); contains Interpro domain(s) IPR007818 Protein of unknown function DUF702
Solyc04g082200	Dehydrin (AHRD V1 *-*- Q1A4H3_COFCA); contains Interpro domain(s) IPR000167 Dehydrin
Solyc04g082630	Glyceraldehyde-3-phosphate dehydrogenase B (AHRD V1 **** B4F8L7_MAIZE); contains Interpro domain(s) IPR000173 Glyceraldehyde 3-phosphate dehydrogenase
Solyc04g082800	Unknown Protein (AHRD V1)
Solyc05g005200	Pyrrolidone-carboxylate peptidase (AHRD V1 **** B6SP89_MAIZE); contains Interpro domain(s) IPR000816 Peptidase C15, pyroglutamyl peptidase I
Solyc05g005300	BHLH transcription factor (AHRD V1 ***- Q84WX1_BRANA); contains Interpro domain(s) IPR011598 Helix-loop-helix DNA-binding
Solyc05g006100	YuxK (AHRD V1 *--- A3U9R9_CROAH); contains Interpro domain(s) IPR007263 Putative thiol-disulphide oxidoreductase DCC
Solyc05g006430	Formin 3 (AHRD V1 *-*- D0QAN4_ARATH); contains Interpro domain(s) IPR015425 Actin-binding FH2
Solyc05g007010	Glyoxal oxidase (AHRD V1 ***- B6TJK4_MAIZE); contains Interpro domain(s) IPR009880 Glyoxal oxidase, N-terminal
Solyc05g007720	Unknown Protein (AHRD V1)
Solyc05g007870	MYB transcription factor (AHRD V1 *-*- Q9C5P9_ARATH); contains Interpro domain(s) IPR015495 Myb transcription factor
Solyc05g008020	Mitogen-activated protein kinase (AHRD V1 **** A9RAB3_WHEAT); contains Interpro domain(s) IPR002290 Serine/threonine protein kinase
Solyc05g008290	Bilirubin oxidase (AHRD V1 ***- C6PN69_9CLOT); contains Interpro domain(s) IPR008972 Cupredoxin
Solyc05g008410	Unknown Protein (AHRD V1)
Solyc05g009170	Zinc finger protein 6 (AHRD V1 ***- B6T066_MAIZE); contains Interpro domain(s) IPR007087 Zinc finger, C2H2-type
Solyc05g009270	Fatty acid elongase 3-ketoacyl-CoA synthase (AHRD V1 **** Q6DUV5_BRANA); contains Interpro domain(s) IPR012392 Very-long-chain 3-ketoacyl-CoA synthase
Solyc05g009500	Peptide transporter (AHRD V1 **-* A6YJX4_9MAGN); contains Interpro domain(s) IPR000109 TGF-beta receptor, type I/II extracellular region
Solyc05g011980	Unknown Protein (AHRD V1)
Solyc05g012280	Genomic DNA chromosome 5 TAC clone K6A12 (AHRD V1 ***- Q9FGR6_ARATH)
Solyc05g012580	Unknown Protein (AHRD V1)
Solyc05g013390	Unknown Protein (AHRD V1)
Solyc05g013440	Primary amine oxidase (AHRD V1 **** B4WL51_9SYNE); contains Interpro domain(s) IPR000269 Copper amine oxidase
Solyc05g013850	Sieve element-occluding protein 3 (AHRD V1 **-- B5THF7_MEDTR)
Solyc05g041200	4-hydroxyphenylpyruvate dioxygenase (AHRD V1 **** B7X935_HEVBR); contains Interpro domain(s) IPR005956 4-hydroxyphenylpyruvate dioxygenase
Solyc05g047710	Plant synaptotagmin (AHRD V1 **-- C5X3E4_SORBI); contains Interpro domain(s) IPR018029 C2 membrane targeting protein
Solyc05g050520	NC domain-containing protein (AHRD V1 **-- A6MD14_9ORYZ); contains Interpro domain(s) IPR007053 NC
Solyc05g051640	Receptor like kinase, RLK
Solyc05g052140	ATP synthase subunit delta&apos;, mitochondrial (AHRD V1 ***- ATP4_IPOBA); contains Interpro domain(s) IPR001469 ATPase, F1 complex, delta/epsilon subunit
Solyc05g052210	Unknown Protein (AHRD V1)
Solyc05g052370	Laccase (AHRD V1 **** Q9ZP47_POPTR); contains Interpro domain(s) IPR008972 Cupredoxin
Solyc05g053440	60S ribosomal protein L29 (AHRD V1 ***- B6SPH4_MAIZE); contains Interpro domain(s) IPR002673 Ribosomal protein L29e
Solyc05g054030	C2H2L domain class transcription factor (AHRD V1 **-* D9ZIU3_MALDO); contains Interpro domain(s) IPR007087 Zinc finger, C2H2-type
Solyc05g054340	Cc-nbs-lrr, resistance protein
Solyc05g054350	Epoxide hydrolase (AHRD V1 **** Q41414_SOLTU); contains Interpro domain(s) IPR000639 Epoxide hydrolase-like
Solyc05g055020	Light-dependent short hypocotyls 1 (AHRD V1 ***- D7M6V0_ARALY); contains Interpro domain(s) IPR006936 Protein of unknown function DUF640
Solyc05g055330	ATP-binding cassette transporter (AHRD V1 ***- D8RL77_SELML); contains Interpro domain(s) IPR013525 ABC-2 type transporter
Solyc05g056620	Myocyte-specific enhancer factor 2D (AHRD V1 *-*- MEF2D_HUMAN); contains Interpro domain(s) IPR002100 Transcription factor, MADS-box IPR002487 Transcription factor, K-box
Solyc06g005560	Expansin-1 (AHRD V1 ***- Q6RX69_PETHY); contains Interpro domain(s) IPR007112 Expansin 45, endoglucanase-like IPR007117 Pollen allergen/expansin, C-terminal
Solyc06g007180	Asparagine synthase (Glutamine-hydrolyzing) (AHRD V1 **** A9EDI4_9FLAO); contains Interpro domain(s) IPR006426 Asparagine synthase, glutamine-hydrolyzing
Solyc06g009190	Pectinesterase (AHRD V1 ***- B9SAU4_RICCO); contains Interpro domain(s) IPR000070 Pectinesterase, catalytic
Solyc06g010170	Lysine ketoglutarate reductase trans-splicing related 1 (AHRD V1 ***- B6TPP1_MAIZE); contains Interpro domain(s) IPR007877 Protein of unknown function DUF707
Solyc06g011350	Aquaporin 2 (AHRD V1 ***- O65357_SAMSA); contains Interpro domain(s) IPR012269 Aquaporin
Solyc06g035530	Gibberellin 20-oxidase-2 (AHRD V1 **** Q9ZPP3_SOLLC); contains Interpro domain(s) IPR005123 Oxoglutarate and iron-dependent oxygenase
Solyc06g035580	Choline dehydrogenase (AHRD V1 ***- C0G363_9RHIZ); contains Interpro domain(s) IPR012132 Glucose-methanol-choline oxidoreductase
Solyc06g036110	C2 domain-containing protein (AHRD V1 *--- Q5DVL6_HORVD); contains Interpro domain(s) IPR018029 C2 membrane targeting protein
Solyc06g036540	Unknown Protein (AHRD V1)
Solyc06g049050	Expansin (AHRD V1 ***- O82625_SOLLC); contains Interpro domain(s) IPR007112 Expansin 45, endoglucanase-like IPR007117 Pollen allergen/expansin, C-terminal
Solyc06g050350	Myosin heavy chain-like (AHRD V1 ***- Q7XIW7_ORYSJ); contains Interpro domain(s) IPR008545 Protein of unknown function DUF827, plant
Solyc06g050500	Abscisic acid receptor PYL4 (AHRD V1 *--- PYL4_ARATH); contains Interpro domain(s) IPR019587 Polyketide cyclase/dehydrase
Solyc06g050800	Amino acid transporter (AHRD V1 **** B9HYI5_POPTR); contains Interpro domain(s) IPR013057 Amino acid transporter, transmembrane
Solyc06g051940	Protein phosphatase 2C (AHRD V1 **** A1IGC7_TOBAC); contains Interpro domain(s) IPR015655 Protein phosphatase 2C
Solyc06g053140	Senescence-associated protein DIN1 (AHRD V1 *--- B6U016_MAIZE); contains Interpro domain(s) IPR001763 Rhodanese-like
Solyc06g054070	Non-specific lipid-transfer protein (AHRD V1 ***- C6T196_SOYBN); contains Interpro domain(s) IPR003612 Plant lipid transfer protein/seed storage/trypsin-alpha amylase inhibitor
Solyc06g054620	Zinc finger CCCH domain-containing protein 34 (AHRD V1 ***- C3H34_ARATH); contains Interpro domain(s) IPR000571 Zinc finger, CCCH-type
Solyc06g054640	Plant-specific domain TIGR01615 family protein (AHRD V1 ***- B6TMA8_MAIZE); contains Interpro domain(s) IPR006502 Protein of unknown function DUF506, plant
Solyc06g054670	Stearoyl-acyl carrier protein desaturase (AHRD V1 **** Q8LA10_ARATH); contains Interpro domain(s) IPR005067 Fatty acid desaturase, type 2
Solyc06g059740	Alcohol dehydrogenase 2 (AHRD V1 **** Q84UY3_PETHY); contains Interpro domain(s) IPR002085 Alcohol dehydrogenase superfamily, zinc-containing
Solyc06g060620	Nitrate transporter (AHRD V1 **** Q852P5_TOBAC); contains Interpro domain(s) IPR000109 TGF-beta receptor, type I/II extracellular region
Solyc06g061250	Ring H2 finger protein (AHRD V1 *-*- D9ZHD8_HYPPE); contains Interpro domain(s) IPR018957 Zinc finger, C3HC4 RING-type
Solyc06g062400	Chloroplast unusual positioning 1A (AHRD V1 *--- B3IYT7_ADICA)
Solyc06g063220	ATP synthase subunit epsilon mitochondrial (AHRD V1 ***- C1BV39_9MAXI); contains Interpro domain(s) IPR006721 ATPase, F1 complex, epsilon subunit, mitochondrial
Solyc06g064960	GDSL esterase/lipase 5 (AHRD V1 **** GLIP5_ARATH); contains Interpro domain(s) IPR001087 Lipase, GDSL
Solyc06g065100	Myb-like transcription factor 1 (AHRD V1 **** Q8H271_GOSHI); contains Interpro domain(s) IPR015495 Myb transcription factor
Solyc06g065260	Receptor like kinase, RLK
Solyc06g065900	Serine-rich protein (AHRD V1 ***- Q8L8M8_ARATH)
Solyc06g065970	Cortical cell-delineating protein (AHRD V1 **-- B6UGA2_MAIZE); contains Interpro domain(s) IPR013770 Plant lipid transfer protein and hydrophobic protein, helical
Solyc06g066170	Pinoresinol-lariciresinol reductase (AHRD V1 **** A3R052_LINPE); contains Interpro domain(s) IPR008030 NmrA-like
Solyc06g066640	Photosystem I reaction center subunit VI-1, chloroplastic (AHRD V1 ***- PSAH1_ARATH); contains Interpro domain(s) IPR004928 Photosystem I reaction centre subunit VI
Solyc06g067950	Acyl-protein thioesterase 2 (AHRD V1 **-- B6T1C9_MAIZE); contains Interpro domain(s) IPR003140 Phospholipase/carboxylesterase
Solyc06g068450	CBL-interacting protein kinase (AHRD V1 **** A5YAI9_GOSHI); contains Interpro domain(s) IPR002290 Serine/threonine protein kinase
Solyc06g069240	Teosinte-branched-like protein (Fragment) (AHRD V1 *-*- Q9FNU7_POPTR); contains Interpro domain(s) IPR005333 Transcription factor, TCP
Solyc06g069430	MADS box transcription factor (AHRD V1 ***- Q9SBQ1_PETHY); contains Interpro domain(s) IPR002487 Transcription factor, K-box
Solyc06g069730	Chlorophyll a-b binding protein 4, chloroplastic (AHRD V1 ***- CA4_ARATH); contains Interpro domain(s) IPR001344 Chlorophyll A-B binding protein
Solyc06g070900	TCP family transcription factor (AHRD V1 *-** A6MCZ2_9ORYZ); contains Interpro domain(s) IPR005333 Transcription factor, TCP
Solyc06g071640	Alliinase (Fragment) (AHRD V1 ***- Q94EJ8_ALLFI); contains Interpro domain(s) IPR006948 Allinase, C-terminal
Solyc06g072480	Knotted-like homeobox protein (AHRD V1 *--- Q49RB7_POPTO); contains Interpro domain(s) IPR005541 KNOX2
Solyc06g072600	Mitochondrial import inner membrane translocase subunit Tim8 (AHRD V1 ***- B6SQH6_MAIZE); contains Interpro domain(s) IPR004217 Mitochondrial inner membrane translocase complex, Tim8/9/10/13-zinc finger-like
Solyc06g072700	Metal ion binding protein (AHRD V1 *--* B6U064_MAIZE); contains Interpro domain(s) IPR006121 Heavy metal transport/detoxification protein
Solyc06g073290	Gun4-like protein (AHRD V1 *-*- D8RVB0_SELML); contains Interpro domain(s) IPR008629 GUN4-like
Solyc06g073800	40S ribosomal protein S11 (AHRD V1 ***- D7MBM0_ARALY); contains Interpro domain(s) IPR000266 Ribosomal protein S17
Solyc06g073920	YABBY-like transcription factor CRABS CLAW-like protein (AHRD V1 **-* Q6SRZ7_ANTMA); contains Interpro domain(s) IPR006780 YABBY protein
Solyc06g074150	LRR receptor-like serine/threonine-protein kinase, RLP
Solyc06g074170	NAC domain protein IPR003441 (AHRD V1 ***- B9HQ28_POPTR); contains Interpro domain(s) IPR003441 No apical meristem (NAM) protein
Solyc06g074350	self-pruning
Solyc06g074820	Aquaporin-like protein (AHRD V1 ***- D1M6Z5_CAPAN); contains Interpro domain(s) IPR012269 Aquaporin
Solyc06g075250	C2H2L domain class transcription factor (AHRD V1 **-* D9ZIU4_MALDO); contains Interpro domain(s) IPR007087 Zinc finger, C2H2-type
Solyc06g075510	AP2-like ethylene-responsive transcription factor At1g16060 (AHRD V1 *--- AP2L1_ARATH); contains Interpro domain(s) IPR001471 Pathogenesis-related transcriptional factor and ERF, DNA-binding
Solyc06g075630	Dirigent-like protein (AHRD V1 ***- B6TVE6_MAIZE); contains Interpro domain(s) IPR004265 Plant disease resistance response protein
Solyc06g076050	Ankyrin repeat domain-containing protein 28 (AHRD V1 ***- B6TJ47_MAIZE); contains Interpro domain(s) IPR002110 Ankyrin
Solyc06g076140	Metallothionein-like protein (AHRD V1 ***- A9YTZ3_SOLTU); contains Interpro domain(s) IPR000347 Plant metallothionein, family 15
Solyc06g076400	Protein phosphatase 2C (AHRD V1 **** Q8RVG0_TOBAC); contains Interpro domain(s) IPR015655 Protein phosphatase 2C
Solyc06g076420	Unknown Protein (AHRD V1)
Solyc06g076520	class I heat shock protein (AHRD V1 ***- Q69BI7_CARPA); contains Interpro domain(s) IPR002068 Heat shock protein Hsp20
Solyc06g076670	Nuclear SR-like RNA binding protein (AHRD V1 *--- A8JAT7_CHLRE); contains Interpro domain(s) IPR012677 Nucleotide-binding, alpha-beta plait
Solyc06g082300	UDP-glucosyltransferase (AHRD V1 **** A9X3L6_9ASTR); contains Interpro domain(s) IPR002213 UDP-glucuronosyl/UDP-glucosyltransferase
Solyc06g082680	Cytochrome b-c1 complex subunit 8 (AHRD V1 **** D6BQP2_9ROSI); contains Interpro domain(s) IPR020101 Cytochrome b-c1 complex, subunit 8
Solyc06g083360	DNA-directed RNA Polymerase II subunit L (AHRD V1 ***- A3GGI8_PICST); contains Interpro domain(s) IPR000268 RNA polymerases, N/8 kDa subunit
Solyc06g083470	Tropinone reductase-like protein 16 (AHRD V1 **-- B2BXZ1_9BRAS); contains Interpro domain(s) IPR002347 Glucose/ribitol dehydrogenase
Solyc06g083490	Tropinone reductase-like protein 16 (AHRD V1 **-- B2BXZ1_9BRAS); contains Interpro domain(s) IPR002347 Glucose/ribitol dehydrogenase
Solyc06g083570	Thioredoxin-like protein 4B (AHRD V1 **-- B6TUU2_MAIZE); contains Interpro domain(s) IPR004123 mRNA splicing factor, thioredoxin-like U5 snRNP
Solyc06g083580	Pectate lyase 1-27 (AHRD V1 **** B9TU35_9ROSI); contains Interpro domain(s) IPR002022 Pectate lyase/Amb allergen
Solyc06g084050	Photosystem II reaction center W protein (AHRD V1 ***- B6TMB3_MAIZE); contains Interpro domain(s) IPR009806 Photosystem II protein PsbW, class 2
Solyc07g005190	Lysosomal Pro-X carboxypeptidase (AHRD V1 **-* B6TWH6_MAIZE); contains Interpro domain(s) IPR008758 Peptidase S28
Solyc07g005440	CBL-interacting protein kinase 9 (AHRD V1 **** A0MNJ6_POPTR); contains Interpro domain(s) IPR002290 Serine/threonine protein kinase
Solyc07g006220	UDP-D-glucuronate 4-epimerase 1 (AHRD V1 **** D7MBW0_ARALY); contains Interpro domain(s) IPR016040 NAD(P)-binding domain
Solyc07g006380	Defensin-like protein (AHRD V1 ***- Q948T3_PYRPY); contains Interpro domain(s) IPR008177 Gamma Purothionin
Solyc07g006600	GDU1 (AHRD V1 *-*- B6TNE4_MAIZE)
Solyc07g007760	Defensin protein (AHRD V1 ***- B1N681_SOLPI); contains Interpro domain(s) IPR008177 Gamma Purothionin
Solyc07g007980	ATP binding / serine-threonine kinase (AHRD V1 **** C5DB71_VITVI); contains Interpro domain(s) IPR002290 Serine/threonine protein kinase
Solyc07g008010	Myb transcription factor (AHRD V1 *--* Q6Q789_VITVI); contains Interpro domain(s) IPR015495 Myb transcription factor
Solyc07g008570	Purple acid phosphatase (AHRD V1 **-* B0WRM8_CULQU); contains Interpro domain(s) IPR008963 Purple acid phosphatase-like, N-terminal
Solyc07g008670	AT1G74160 protein (Fragment) (AHRD V1 *-*- B9DHP4_ARATH)
Solyc07g014680	Potassium transporter (AHRD V1 *-** A0MNZ1_THEHA); contains Interpro domain(s) IPR003445 Cation transporter
Solyc07g015970	Mitochondrial import receptor subunit TOM7-1 (AHRD V1 ***- B6SJR3_MAIZE); contains Interpro domain(s) IPR012621 Mitochondrial outer membrane translocase complex, subunitt Tom7
Solyc07g017610	Saccharopine dehydrogenase (NAD(+) L-glutamate-forming) (AHRD V1 *-** C7PUW7_CHIPD); contains Interpro domain(s) IPR005097 Saccharopine dehydrogenase
Solyc07g020960	BHLH transcription factor-like protein (AHRD V1 *-** Q5ZAK6_ORYSJ); contains Interpro domain(s) IPR011598 Helix-loop-helix DNA-binding
Solyc07g039310	Polyamine oxidase (AHRD V1 **** Q8LL67_AMAHP); contains Interpro domain(s) IPR002937 Amine oxidase
Solyc07g040890	CXE carboxylesterase (Fragment) (AHRD V1 **-* Q0ZPV6_9ERIC); contains Interpro domain(s) IPR013094 Alpha/beta hydrolase fold-3
Solyc07g041780	OBP3-responsive gene 4 (AHRD V1 **-- D7L9C5_ARALY)
Solyc07g042390	Pectinesterase (AHRD V1 **** B7SIX2_9CONI); contains Interpro domain(s) IPR006501 Pectinesterase inhibitor
Solyc07g043320	Unknown Protein (AHRD V1); contains Interpro domain(s) IPR009053 Prefoldin
Solyc07g045450	Unknown Protein (AHRD V1)
Solyc07g047680	F-box protein GID2 (AHRD V1 *-*- B6SU06_MAIZE); contains Interpro domain(s) IPR001810 Cyclin-like F-box
Solyc07g053220	Receptor-like protein kinase (AHRD V1 ***- Q9LLN5_ORYSA); contains Interpro domain(s) IPR002290 Serine/threonine protein kinase
Solyc07g053320	Fiber protein Fb32 (AHRD V1 *-*- Q6UA04_GOSBA)
Solyc07g053450	BZIP transcription factor family protein (AHRD V1 **** D7LW03_ARALY); contains Interpro domain(s) IPR011700 Basic leucine zipper
Solyc07g054170	Expansin B1 (AHRD V1 ***- C8CC40_RAPSA); contains Interpro domain(s) IPR007117 Pollen allergen/expansin, C-terminal
Solyc07g054180	Unknown Protein (AHRD V1); contains Interpro domain(s) IPR000996 Clathrin light chain
Solyc07g054430	Glutamate formiminotransferase (AHRD V1 **** B6UFR4_MAIZE); contains Interpro domain(s) IPR012886 Formiminotransferase, N-terminal
Solyc07g054780	Wound induced protein (AHRD V1 ***- B6T0U0_MAIZE)
Solyc07g055840	Citrate synthase (AHRD V1 **** B9IFM7_POPTR); contains Interpro domain(s) IPR010953 Citrate synthase, type II
Solyc07g056170	Subtilisin-like protease (AHRD V1 ***- Q6WNU4_SOYBN); contains Interpro domain(s) IPR015500 Peptidase S8, subtilisin-related
Solyc07g056310	Glucan endo-1 3-beta-glucosidase 4 (AHRD V1 *-*- B6T2U4_MAIZE); contains Interpro domain(s) IPR012946 X8
Solyc07g056410	Receptor like kinase, RLK
Solyc07g056440	Glutathione S-transferase-like protein (AHRD V1 **** Q8GVD1_SOLLC); contains Interpro domain(s) IPR004046 Glutathione S-transferase, C-terminal
Solyc07g056540	L-lactate dehydrogenase (AHRD V1 ***- C0S8Q7_PARBP); contains Interpro domain(s) IPR012133 Alpha-hydroxy acid dehydrogenase, FMN-dependent
Solyc07g061750	Ankyrin repeat family protein-like (AHRD V1 **-- Q6ERI3_ORYSJ); contains Interpro domain(s) IPR002110 Ankyrin
Solyc07g063390	Beta-glucosidase (AHRD V1 **** B6SYQ7_MAIZE); contains Interpro domain(s) IPR001360 Glycoside hydrolase, family 1
Solyc07g063640	Wound induced protein (AHRD V1 ***- B6SKC8_MAIZE)
Solyc07g064410	Ubiquitin-conjugating enzyme-like protein (AHRD V1 *--- A4HBP2_LEIBR); contains Interpro domain(s) IPR019547 Kua-ubiquitin conjugating enzyme hybrid, localisation
Solyc07g064790	Unknown Protein (AHRD V1)
Solyc07g065880	Kinesin (AHRD V1 *-*- Q5MNW6_GOSHI); contains Interpro domain(s) IPR001752 Kinesin, motor region
Solyc07g065920	Ferredoxin-fold anticodon-binding domain-containing protein 1 (AHRD V1 *--* FDXA1_HUMAN); contains Interpro domain(s) IPR019446 Domain of unknown function DUF2431
Solyc07g065970	Chaperone protein dnaJ 11 (AHRD V1 *-*- B6SS19_MAIZE); contains Interpro domain(s) IPR001623 Heat shock protein DnaJ, N-terminal
Solyc08g005260	Myb family transcription factor-like protein (AHRD V1 *--- Q84UP8_ORYSJ); contains Interpro domain(s) IPR006447 Myb-like DNA-binding region, SHAQKYF class
Solyc08g006200	B3 domain-containing transcription factor VRN1 (AHRD V1 *-** VRN1_ARATH); contains Interpro domain(s) IPR003340 Transcriptional factor B3
Solyc08g006860	Patatin (AHRD V1 ***- Q7DMP8_SOLBR); contains Interpro domain(s) IPR002641 Patatin
Solyc08g007080	Inositol 1 4 5-trisphosphate 5-phosphatase (AHRD V1 **** Q712G2_ARATH); contains Interpro domain(s) IPR000300 Inositol polyphosphate related phosphatase
Solyc08g007120	Inhibitor of apoptosis-like protein (AHRD V1 *--- B6T3H2_MAIZE); contains Interpro domain(s) IPR017066 S-ribonuclease binding protein, SBP1, pollen
Solyc08g007570	Unknown Protein (AHRD V1)
Solyc08g008310	Long-chain-fatty-acid-CoA ligase (AHRD V1 **** B2WS80_ARAHA); contains Interpro domain(s) IPR000873 AMP-dependent synthetase and ligase
Solyc08g013670	Photosystem I reaction center subunit (AHRD V1 ***- D2K7Z2_TOBAC); contains Interpro domain(s) IPR008796 Photosystem I reaction centre subunit N
Solyc08g016160	Cation/H(+) antiporter 15 (AHRD V1 **** CHX15_ARATH); contains Interpro domain(s) IPR006153 Cation/H+ exchanger
Solyc08g022240	Lipase-like protein (AHRD V1 ***- Q8LF19_ARATH); contains Interpro domain(s) IPR002921 Lipase, class 3
Solyc08g028780	AT5G28150-like protein (Fragment) (AHRD V1 *-*- D6PS16_9BRAS); contains Interpro domain(s) IPR008586 Protein of unknown function DUF868, plant
Solyc08g029050	WD-repeat protein (AHRD V1 *--- A9FTS8_SORC5); contains Interpro domain(s) IPR017986 WD40 repeat, region
Solyc08g042000	Sucrose phosphate synthase protein 1 (AHRD V1 **** B2BMQ3_PRUPE); contains Interpro domain(s) IPR012819 Sucrose phosphate synthase, plant
Solyc08g061270	Unknown Protein (AHRD V1); contains Interpro domain(s) IPR012876 Protein of unknown function DUF1677, plant
Solyc08g062450	class II heat shock protein (AHRD V1 ***- B6T339_MAIZE); contains Interpro domain(s) IPR002068 Heat shock protein Hsp20
Solyc08g063090	Delta-6-desaturase (AHRD V1 **** D3YN48_9ERIC); contains Interpro domain(s) IPR012171 Fatty acid/sphingolipid desaturase
Solyc08g065410	Abscisic acid receptor PYL2 (AHRD V1 **-* PYL2_ARATH); contains Interpro domain(s) IPR019587 Polyketide cyclase/dehydrase
Solyc08g065850	Unknown Protein (AHRD V1)
Solyc08g066420	Lachrymatory-factor synthase (AHRD V1 ***- B6UBY7_MAIZE); contains Interpro domain(s) IPR019587 Polyketide cyclase/dehydrase
Solyc08g066660	Ethylene-responsive transcription factor 1 (AHRD V1 *-*- ERF1_ORYSJ); contains Interpro domain(s) IPR001471 Pathogenesis-related transcriptional factor and ERF, DNA-binding
Solyc08g066880	5&apos-methylthioadenosine/S-adenosylhomocysteine nucleosidase (AHRD V1 *-*- D6E0Z8_9FIRM); contains Interpro domain(s) IPR018017 Nucleoside phosphorylase, family 1
Solyc08g066900	5&apos;-methylthioadenosine/S-adenosylhomocysteine nucleosidase (AHRD V1 *-*- MTNN_AERHH); contains Interpro domain(s) IPR018017 Nucleoside phosphorylase, family 1
Solyc08g067320	Chlorophyll a/b binding protein (AHRD V1 ***- Q41422_SOLTU); contains Interpro domain(s) IPR001344 Chlorophyll A-B binding protein
Solyc08g067330	Chlorophyll a-b binding protein 3C-like (AHRD V1 ***- Q2XTE0_SOLTU); contains Interpro domain(s) IPR001344 Chlorophyll A-B binding protein
Solyc08g067530	Non-specific lipid-transfer protein (AHRD V1 ***- Q850K5_VITVI); contains Interpro domain(s) IPR013770 Plant lipid transfer protein and hydrophobic protein, helical
Solyc08g068170	Plant-specific domain TIGR01568 family protein (AHRD V1 *--- B6SHS0_MAIZE); contains Interpro domain(s) IPR006458 Protein of unknown function DUF623, plant
Solyc08g068230	Pentatricopeptide repeat-containing protein (AHRD V1 ***- D7M4J8_ARALY); contains Interpro domain(s) IPR002885 Pentatricopeptide repeat
Solyc08g074750	Zinc finger protein 706 (AHRD V1 -**- C3KIH7_ANOFI); contains Interpro domain(s) IPR015023 Protein of unknown function DUF1909
Solyc08g075190	Unknown Protein (AHRD V1)
Solyc08g075870	Dehydration-responsive family protein-like (AHRD V1 **-- Q6EP94_ORYSJ); contains Interpro domain(s) IPR004159 Protein of unknown function DUF248, methyltransferase putative
Solyc08g075940	DNA-directed RNA polymerase (AHRD V1 ***- B9IL57_POPTR); contains Interpro domain(s) IPR015712 DNA-directed RNA polymerase, subunit 2
Solyc08g077010	AT-hook DNA-binding protein (Fragment) (AHRD V1 *--* A1DR79_CATRO); contains Interpro domain(s) IPR014476 Predicted AT-hook DNA-binding
Solyc08g077170	Peptide transporter-like protein (AHRD V1 **-* Q9SVS9_ARATH); contains Interpro domain(s) IPR000109 TGF-beta receptor, type I/II extracellular region
Solyc08g077510	Poly(U)-specific endoribonuclease-A (AHRD V1 **** ENDUA_XENLA); contains Interpro domain(s) IPR018998 Endoribonuclease XendoU
Solyc08g077710	60S ribosomal protein L37a (AHRD V1 ***- Q5GMM4_CAPCH); contains Interpro domain(s) IPR002674 Ribosomal protein L37ae
Solyc08g078090	Lipase (Fragment) (AHRD V1 ***- Q9ZTW1_DIACA); contains Interpro domain(s) IPR002921 Lipase, class 3
Solyc08g078960	Oxysterol-binding family protein (AHRD V1 **** D7ME32_ARALY); contains Interpro domain(s) IPR000648 Oxysterol-binding protein
Solyc08g078970	Pleckstrin homology domain-containing family A member 3 (AHRD V1 *-*- PKHA3_MOUSE); contains Interpro domain(s) IPR011993 Pleckstrin homology-type
Solyc08g079310	Cytochrome P450
Solyc08g079700	Zinc finger A20 and AN1 domain-containing stress-associated protein 7 (AHRD V1 ***- SAP7_ARATH); contains Interpro domain(s) IPR000058 Zinc finger, AN1-type
Solyc08g080040	Anthocyanidin synthase (AHRD V1 ***- D3XFG1_THECC); contains Interpro domain(s) IPR005123 Oxoglutarate and iron-dependent oxygenase
Solyc08g080460	Serine/threonine protein kinase (AHRD V1 *-** C4PKQ3_PRUPE); contains Interpro domain(s) IPR002290 Serine/threonine protein kinase
Solyc08g081220	Cytochrome P450
Solyc08g081890	Multidrug resistance protein ABC transporter family (AHRD V1 **-- B9GX56_POPTR); contains Interpro domain(s) IPR003439 ABC transporter-like
Solyc08g082630	Auxin response factor 9 (AHRD V1 **** D7R605_SOLLC); contains Interpro domain(s) IPR010525 Auxin response factor
Solyc08g082900	WD-40 repeat family protein (AHRD V1 **-- D7KS76_ARALY); contains Interpro domain(s) IPR020472 G-protein beta WD-40 repeat, region
Solyc08g083050	Unknown Protein (AHRD V1)
Solyc08g083200	Unknown Protein (AHRD V1)
Solyc08g083210	Endoglucanase 1 (AHRD V1 ***- B6U0P7_MAIZE); contains Interpro domain(s) IPR001701 Glycoside hydrolase, family 9
Solyc08g083400	Auxin response factor 24 (AHRD V1 *-*- D9HNV1_MAIZE); contains Interpro domain(s) IPR003340 Transcriptional factor B3
Solyc09g005070	Transcription factor (Fragment) (AHRD V1 *-*- D6MK13_9ASPA); contains Interpro domain(s) IPR001092 Basic helix-loop-helix dimerisation region bHLH
Solyc09g005110	Pyruvate decarboxylase 1 (AHRD V1 **** Q84V95_LOTCO); contains Interpro domain(s) IPR012110 Pyruvate decarboxylase/indolepyruvate decarboxylase
Solyc09g005470	NAD-dependent epimerase/dehydratase (AHRD V1 **-- B2J2A7_NOSP7); contains Interpro domain(s) IPR016040 NAD(P)-binding domain
Solyc09g007750	Receptor-like kinase (AHRD V1 *-*- C6ZRP5_SOYBN); contains Interpro domain(s) IPR002290 Serine/threonine protein kinase
Solyc09g007830	Cytokinin riboside 5&apos;-monophosphate phosphoribohydrolase LOG (AHRD V1 **-- LOG_ORYSJ); contains Interpro domain(s) IPR005269 Conserved hypothetical protein CHP00730
Solyc09g008320	Xyloglucan endotransglucosylase/hydrolase 12 (AHRD V1 **** C0IRH1_9ERIC); contains Interpro domain(s) IPR016455 Xyloglucan endotransglucosylase/hydrolase
Solyc09g008770	Group 3 late embryogenesis abundant protein (AHRD V1 **-- Q2N1E0_PHAVU); contains Interpro domain(s) IPR004238 Late embryogenesis abundant protein
Solyc09g008830	Os01g0318400 protein (Fragment) (AHRD V1 *-*- Q7XXQ7_ORYSJ)
Solyc09g008860	Receptor like kinase, RLK
Solyc09g008970	Unknown Protein (AHRD V1)
Solyc09g009250	Trihelix transcription factor (AHRD V1 **-* Q6Q6T0_ARATH); contains Interpro domain(s) IPR017877 MYB-like
Solyc09g009420	Unknown Protein (AHRD V1)
Solyc09g009660	Solute carrier family 35 member F1 (AHRD V1 **-- B6TXS8_MAIZE); contains Interpro domain(s) IPR009262 Protein of unknown function DUF914, eukaryotic
Solyc09g010430	Unknown Protein (AHRD V1)
Solyc09g010800	Type 2 metallothionein (AHRD V1 ***- B3VKV4_SOLNI); contains Interpro domain(s) IPR000347 Plant metallothionein, family 15
Solyc09g011080	Ribulose-1 5-bisphosphate carboxylase/oxygenase activase 1 (AHRD V1 **** Q9AXG1_GOSHI); contains Interpro domain(s) IPR003959 ATPase, AAA-type, core
Solyc09g011600	Glutathione S-transferase-like protein (AHRD V1 **** A8DUB0_SOLLC); contains Interpro domain(s) IPR004046 Glutathione S-transferase, C-terminal
Solyc09g014220	Peptide transporter (AHRD V1 **-* O48542_HORVU); contains Interpro domain(s) IPR000109 TGF-beta receptor, type I/II extracellular region
Solyc09g018280	Calcium/calmodulin-dependent protein kinase type 1 (AHRD V1 *-** KCC1A_MOUSE); contains Interpro domain(s) IPR002290 Serine/threonine protein kinase
Solyc09g063010	BHLH transcription factor (AHRD V1 *-** B6TXR4_MAIZE); contains Interpro domain(s) IPR011598 Helix-loop-helix DNA-binding
Solyc09g065100	Transcription factor (AHRD V1 *--* Q9M4A8_MAIZE); contains Interpro domain(s) IPR001092 Basic helix-loop-helix dimerisation region bHLH
Solyc09g065910	Photosystem II reaction center W protein (AHRD V1 ***- B6TMB3_MAIZE); contains Interpro domain(s) IPR009806 Photosystem II protein PsbW, class 2
Solyc09g074210	Endonuclease/exonuclease/phosphatase family protein (AHRD V1 ***- D7LHF0_ARALY); contains Interpro domain(s) IPR005135 Endonuclease/exonuclease/phosphatase
Solyc09g075420	Ethylene responsive transcription factor 2b (AHRD V1 *-*- C0J9I6_9ROSA); contains Interpro domain(s) IPR001471 Pathogenesis-related transcriptional factor and ERF, DNA-binding IPR001711 Phospholipase C, phosphatidylinositol-specific, Y domain
Solyc09g075870	Lipoxygenase (AHRD V1 **** B9RSQ2_RICCO); contains Interpro domain(s) IPR001246 Lipoxygenase, plant
Solyc09g082080	Plant-specific domain TIGR01568 family protein (AHRD V1 *--- B6UEQ7_MAIZE); contains Interpro domain(s) IPR006458 Protein of unknown function DUF623, plant
Solyc09g082110	Seed maturation protein (AHRD V1 **-- Q2Q4X9_MEDTR); contains Interpro domain(s) IPR007011 Seed maturation protein
Solyc09g082660	Caffeoyl-CoA O-methyltransferase (AHRD V1 **** A9X9L7_BAMOL); contains Interpro domain(s) IPR002935 O-methyltransferase, family 3
Solyc09g083330	Phosphatidate cytidylyltransferase (AHRD V1 **** B9RXC8_RICCO); contains Interpro domain(s) IPR016720 Phosphatidate cytidylyltransferase, eukaryota
Solyc09g083390	Genomic DNA chromosome 5 TAC clone K9D7 (AHRD V1 *-*- Q9FIX7_ARATH); contains Interpro domain(s) IPR018144 Plus-3 domain, subgroup
Solyc09g084470	Proteinase inhibitor I (AHRD V1 ***- Q43648_SOLTU); contains Interpro domain(s) IPR000864 Proteinase inhibitor I13, potato inhibitor I
Solyc09g089890	Ring H2 finger protein (AHRD V1 *-*- D9ZHD8_HYPPE); contains Interpro domain(s) IPR018957 Zinc finger, C3HC4 RING-type
Solyc09g090040	Germin-like protein 5 (AHRD V1 ***- A8QK91_VITVI); contains Interpro domain(s) IPR014710 RmlC-like jelly roll fold
Solyc09g090070	Inorganic phosphate transporter (AHRD V1 **** O22548_SOLLC); contains Interpro domain(s) IPR004738 Phosphate permease
Solyc09g090180	Light-dependent short hypocotyls 1 (AHRD V1 ***- D7M6V0_ARALY); contains Interpro domain(s) IPR006936 Protein of unknown function DUF640
Solyc09g090500	Cyclopropane-fatty-acyl-phospholipid synthase (AHRD V1 ***- C7LRK7_DESBD); contains Interpro domain(s) IPR003333 Cyclopropane-fatty-acyl-phospholipid synthase
Solyc09g090680	Cysteine-rich repeat secretory protein 3 (AHRD V1 ***- CRR3_ARATH); contains Interpro domain(s) IPR002902 Protein of unknown function DUF26
Solyc09g091490	Transcription factor jumonji domain-containing protein (AHRD V1 **-* D7M504_ARALY); contains Interpro domain(s) IPR013129 Transcription factor jumonji
Solyc09g091810	Unknown Protein (AHRD V1)
Solyc09g091940	Unknown Protein (AHRD V1)
Solyc09g092500	UDP-glucosyltransferase family 1 protein (AHRD V1 **** C6KI44_CITSI); contains Interpro domain(s) IPR002213 UDP-glucuronosyl/UDP-glucosyltransferase
Solyc09g097930	MazG nucleotide pyrophosphohydrolase (AHRD V1 ***- B1J275_PSEPW); contains Interpro domain(s) IPR004518 NTP pyrophosphohydrolase MazG, putative catalytic core
Solyc10g005250	Genomic DNA chromosome 5 P1 clone MXC20 (AHRD V1 *--- Q9FLX2_ARATH)
Solyc10g005320	Tryptophan synthase beta chain 1 (AHRD V1 **** Q0WUI8_ARATH); contains Interpro domain(s) IPR006654 Tryptophan synthase, beta chain
Solyc10g006230	Chlorophyll a-b binding protein 7, chloroplastic (AHRD V1 ***- CB12_SOLLC); contains Interpro domain(s) IPR001344 Chlorophyll A-B binding protein
Solyc10g006860	Dehydrogenase/reductase SDR family protein 7-like (AHRD V1 **-- DHRS7_DROME); contains Interpro domain(s) IPR002347 Glucose/ribitol dehydrogenase
Solyc10g006900	Protochlorophyllide reductase (AHRD V1 ***- Q8LAV9_ARATH); contains Interpro domain(s) IPR005979 Light-dependent protochlorophyllide reductase
Solyc10g007690	Chlorophyll a-b binding protein 8, chloroplastic (AHRD V1 ***- CB13_SOLLC); contains Interpro domain(s) IPR001344 Chlorophyll A-B binding protein
Solyc10g008040	Seed biotin-containing protein SBP65 (AHRD V1 *-*- SBP65_PEA); contains Interpro domain(s) IPR006777 Microvirus H protein (pilot protein)
Solyc10g008410	RING finger protein 5 (AHRD V1 *-*- B6UBI0_MAIZE); contains Interpro domain(s) IPR018957 Zinc finger, C3HC4 RING-type
Solyc10g008520	Auxin-responsive GH3-like (AHRD V1 ***- Q0GUM1_ARATH); contains Interpro domain(s) IPR004993 GH3 auxin-responsive promoter
Solyc10g008830	GDSL esterase/lipase At5g45960 (AHRD V1 ***- GDL86_ARATH); contains Interpro domain(s) IPR001087 Lipase, GDSL
Solyc10g008870	Transcription elongation factor 1 homolog (AHRD V1 **** C1C367_9MAXI); contains Interpro domain(s) IPR007808 Protein of unknown function DUF701, zinc-binding putative
Solyc10g009190	Cold shock protein-1 (AHRD V1 *-*- B6SP63_MAIZE)
Solyc10g011740	Ubiquitin-conjugating enzyme E2 8 (AHRD V1 **** UBC8_ARATH); contains Interpro domain(s) IPR000608 Ubiquitin-conjugating enzyme, E2
Solyc10g017630	MADS-box transcription factor (AHRD V1 **** Q1EMR8_PLAMJ); contains Interpro domain(s) IPR002487 Transcription factor, K-box
Solyc10g018510	BHLH transcription factor (AHRD V1 *-** B6TXR4_MAIZE); contains Interpro domain(s) IPR011598 Helix-loop-helix DNA-binding
Solyc10g018780	Squamosa promoter binding protein 1 (AHRD V1 *-*- Q1MU24_PHYPA); contains Interpro domain(s) IPR004333 Transcription factor, SBP-box
Solyc10g018900	Unknown Protein (AHRD V1)
Solyc10g049280	Nucleobase ascorbate transporter (AHRD V1 **-* B9HN10_POPTR); contains Interpro domain(s) IPR006043 Xanthine/uracil/vitamin C permease
Solyc10g050110	LRR receptor-like serine/threonine-protein kinase, RLP
Solyc10g050890	Nitrite reductase (AHRD V1 ***- Q76G13_TOBAC); contains Interpro domain(s) IPR006067 Nitrite and sulphite reductase 4Fe-4S region
Solyc10g051140	Genomic DNA chromosome 5 P1 clone MTE17 (AHRD V1 ***- Q9FJ71_ARATH)
Solyc10g051150	Genomic DNA chromosome 5 P1 clone MDN11 (AHRD V1 *-*- Q9FI29_ARATH)
Solyc10g055250	Cold shock protein-1 (AHRD V1 *-*- Q8LPA7_WHEAT); contains Interpro domain(s) IPR002059 Cold-shock protein, DNA-binding
Solyc10g075050	Non-specific lipid-transfer protein (AHRD V1 ***- A7UGG9_SOLTU); contains Interpro domain(s) IPR013770 Plant lipid transfer protein and hydrophobic protein, helical
Solyc10g075090	Non-specific lipid-transfer protein (AHRD V1 **** Q4A1N0_SOLLC); contains Interpro domain(s) IPR013770 Plant lipid transfer protein and hydrophobic protein, helical
Solyc10g075170	Aspartate aminotransferase (AHRD V1 ***- B9HDA1_POPTR); contains Interpro domain(s) IPR000796 Aspartate/other aminotransferase
Solyc10g076250	Aminotransferase like protein (AHRD V1 ***- Q0WWF1_ARATH); contains Interpro domain(s) IPR005814 Aminotransferase class-III
Solyc10g076280	Solute carrier family 40 member 1 (AHRD V1 **-- S40A1_MOUSE); contains Interpro domain(s) IPR016196 Major facilitator superfamily, general substrate transporter
Solyc10g076410	Abscisic acid receptor PYL4 (AHRD V1 **-- PYL4_ARATH); contains Interpro domain(s) IPR019587 Polyketide cyclase/dehydrase
Solyc10g076510	Pyruvate decarboxylase (AHRD V1 **** B0ZS79_PRUAR); contains Interpro domain(s) IPR012110 Pyruvate decarboxylase/indolepyruvate decarboxylase
Solyc10g076660	Anthocyanidin synthase (AHRD V1 **-- Q2QCX4_GOSHI); contains Interpro domain(s) IPR005123 Oxoglutarate and iron-dependent oxygenase
Solyc10g076730	Pectinesterase (AHRD V1 ***- A9NW72_PICSI); contains Interpro domain(s) IPR006501 Pectinesterase inhibitor
Solyc10g076790	Auxin transporter-like protein 1 (AHRD V1 **** B6U1Y3_MAIZE); contains Interpro domain(s) IPR013057 Amino acid transporter, transmembrane
Solyc10g079460	NPR1-like protein (Fragment) (AHRD V1 ***- Q2QBV6_PYRCO); contains Interpro domain(s) IPR013069 BTB/POZ
Solyc10g079600	Response regulator 6 (AHRD V1 ***- Q9FRY9_MAIZE); contains Interpro domain(s) IPR001789 Signal transduction response regulator, receiver region
Solyc10g079750	NPR1-like protein (Fragment) (AHRD V1 ***- Q2QBV6_PYRCO); contains Interpro domain(s) IPR013069 BTB/POZ
Solyc10g080190	Atozi1 (Fragment) (AHRD V1 **-- A6N1R6_ORYSI); contains Interpro domain(s) IPR009515 Protein of unknown function DUF1138
Solyc10g080360	Unknown Protein (AHRD V1)
Solyc10g081730	Os02g0200800 protein (Fragment) (AHRD V1 *-*- Q0E303_ORYSJ); contains Interpro domain(s) IPR009675 Targeting for Xklp2
Solyc10g081910	Receptor like kinase, RLK
Solyc10g083210	Auxin response factor 1 (AHRD V1 *-*- D9HNS8_MAIZE); contains Interpro domain(s) IPR003340 Transcriptional factor B3
Solyc10g083500	Protein kinase (AHRD V1 *-*- A7VL53_WHEAT); contains Interpro domain(s) IPR002290 Serine/threonine protein kinase
Solyc10g083670	Cellulose synthase-like C2 glycosyltransferase family 2 (AHRD V1 **-* A9RNK0_PHYPA); contains Interpro domain(s) IPR001173 Glycosyl transferase, family 2
Solyc10g084150	Cytokinin riboside 5&apos;-monophosphate phosphoribohydrolase LOG (AHRD V1 **-- LOG_ORYSJ); contains Interpro domain(s) IPR005269 Conserved hypothetical protein CHP00730
Solyc10g084340	AP2-like ethylene-responsive transcription factor At1g16060 (AHRD V1 *--- AP2L1_ARATH); contains Interpro domain(s) IPR001471 Pathogenesis-related transcriptional factor and ERF, DNA-binding
Solyc10g085030	Soul heme-binding family protein (AHRD V1 **** D7LKR5_ARALY); contains Interpro domain(s) IPR006917 SOUL haem-binding protein
Solyc10g085230	UDP-glucosyltransferase (AHRD V1 **** C0LNQ9_MAIZE); contains Interpro domain(s) IPR002213 UDP-glucuronosyl/UDP-glucosyltransferase
Solyc10g085950	Predicted inner membrane protein (AHRD V1 ***- B7UKH4_ECO27); contains Interpro domain(s) IPR005226 Conserved hypothetical protein CHP00245
Solyc10g086240	Glucosyltransferase (AHRD V1 ***- A7M6J0_DIACA); contains Interpro domain(s) IPR002213 UDP-glucuronosyl/UDP-glucosyltransferase
Solyc10g086250	MYB transcription factor (AHRD V1 **-- A9YY82_SOLTU); contains Interpro domain(s) IPR015495 Myb transcription factor
Solyc10g086500	3-oxo-5-alpha-steroid 4-dehydrogenase family protein expressed (AHRD V1 ***- Q53NE6_ORYSJ); contains Interpro domain(s) IPR016636 3-oxo-5-alpha-steroid 4-dehydrogenase IPR001104 3-oxo-5-alpha-steroid 4-dehydrogenase, C-terminal
Solyc11g005820	Pectinesterase inhibitor (AHRD V1 **** A2Q674_MEDTR); contains Interpro domain(s) IPR006501 Pectinesterase inhibitor
Solyc11g006650	Heat shock protein 101 (AHRD V1 *-*- Q3L1D0_VITVI); contains Interpro domain(s) IPR004176 Clp, N-terminal
Solyc11g008440	Amino acid transporter (AHRD V1 **** B9HLH9_POPTR); contains Interpro domain(s) IPR013057 Amino acid transporter, transmembrane
Solyc11g008830	LOB domain protein (AHRD V1 *-*- Q9AS62_ORYSJ); contains Interpro domain(s) IPR004883 Lateral organ boundaries, LOB
Solyc11g009040	EPIDERMAL PATTERNING FACTOR-like protein 1 (AHRD V1 *-*- EPFL1_ARATH)
Solyc11g009050	F-box protein-like (AHRD V1 ***- Q67X80_ORYSJ); contains Interpro domain(s) IPR001810 Cyclin-like F-box
Solyc11g011000	Cysteine-rich repeat secretory protein 60 (AHRD V1 ***- CRR60_ARATH); contains Interpro domain(s) IPR002902 Protein of unknown function DUF26
Solyc11g011210	Gibberellin regulated protein (AHRD V1 **-- A2Q374_MEDTR); contains Interpro domain(s) IPR003854 Gibberellin regulated protein
Solyc11g011920	Glutamate decarboxylase (AHRD V1 ***- Q8LKR4_TOBAC); contains Interpro domain(s) IPR010107 Glutamate decarboxylase
Solyc11g020280	Receptor like kinase, RLK
Solyc11g020710	Unknown Protein (AHRD V1)
Solyc11g021260	Hypothetical chloroplast RF1 (AHRD V1 ***- D7P347_SYZCU)
Solyc11g032130	NADPH dehydrogenase 3 (AHRD V1 **-* OYE3_YEAST); contains Interpro domain(s) IPR001155 NADH:flavin oxidoreductase/NADH oxidase, N-terminal
Solyc11g040330	Endo-1 4-beta-xylanase (AHRD V1 **-- B6SW51_MAIZE); contains Interpro domain(s) IPR013781 Glycoside hydrolase, subgroup, catalytic core
Solyc11g044910	Beta-xylosidase 1 (AHRD V1 ***- D7MNR6_ARALY); contains Interpro domain(s) IPR001764 Glycoside hydrolase, family 3, N-terminal
Solyc11g056620	NB-ARC domain containing protein expressed (AHRD V1 *-*- Q109S4_ORYSJ)
Solyc11g056680	LRR receptor-like serine/threonine-protein kinase, RLP
Solyc11g062440	Laccase (AHRD V1 ***- Q9AUI0_PINTA); contains Interpro domain(s) IPR017760 L-ascorbate oxidase, plants
Solyc11g064770	Cc-nbs-lrr, resistance protein
Solyc11g066470	Unknown Protein (AHRD V1)
Solyc11g066510	Ring H2 finger protein (AHRD V1 ***- D9ZHD8_HYPPE); contains Interpro domain(s) IPR011016 Zinc finger, RING-CH-type
Solyc11g066580	Cytochrome P450
Solyc11g068400	Ubiquinol-cytochrome C reductase (AHRD V1 ***- D6BQN0_9ROSI); contains Interpro domain(s) IPR008027 Ubiquinol-cytochrome C reductase, UQCRX/QCR9-like
Solyc11g068490	cDNA clone J013021P22 full insert sequence (AHRD V1 ***- B7EAV4_ORYSJ)
Solyc11g068890	NHL1 (Fragment) (AHRD V1 **-- B0LZK8_ARATH); contains Interpro domain(s) IPR010847 Harpin-induced 1
Solyc11g069030	MYB transcription factor (AHRD V1 *--- Q9T066_ARATH); contains Interpro domain(s) IPR017930 Myb-type HTH DNA-binding domain
Solyc11g069430	Aquaporin 1 (AHRD V1 ***- Q9M4T0_ALLCE); contains Interpro domain(s) IPR012269 Aquaporin
Solyc11g071620	Aldehyde oxidase (AHRD V1 ***- Q9FV25_SOLLC); contains Interpro domain(s) IPR016208 Aldehyde oxidase/xanthine dehydrogenase
Solyc12g005020	Ring H2 finger protein (AHRD V1 *-*- D9ZHD8_HYPPE); contains Interpro domain(s) IPR018957 Zinc finger, C3HC4 RING-type
Solyc12g006680	Early nodulin 93 protein (AHRD V1 ***- A3FGC9_9ROSI); contains Interpro domain(s) IPR005050 Early nodulin 93 ENOD93 protein
Solyc12g007300	B3 domain-containing protein At1g20600 (AHRD V1 *-*- Y1060_ARATH); contains Interpro domain(s) IPR003340 Transcriptional factor B3
Solyc12g008350	Ethylene-responsive transcription factor 4 (AHRD V1 *-*- ERF78_ARATH); contains Interpro domain(s) IPR001471 Pathogenesis-related transcriptional factor and ERF, DNA-binding
Solyc12g008510	Hexokinase (AHRD V1 ***- Q4PS97_SOLLC); contains Interpro domain(s) IPR001312 Hexokinase
Solyc12g008520	Calmodulin-binding family protein (AHRD V1 **-- Q9ZU28_ARATH); contains Interpro domain(s) IPR000048 IQ calmodulin-binding region
Solyc12g009200	Chlorophyll a-b binding protein, chloroplastic (AHRD V1 ***- CB12_PETHY); contains Interpro domain(s) IPR001344 Chlorophyll A-B binding protein
Solyc12g009300	Sucrose synthase (AHRD V1 **** O82693_SOLLC); contains Interpro domain(s) IPR012820 Sucrose synthase, plants and cyanobacteria IPR000368 Sucrose synthase
Solyc12g009580	CRABS CLAW (Fragment) (AHRD V1 **-- Q5EMM7_GOSHI); contains Interpro domain(s) IPR006780 YABBY protein
Solyc12g010020	Leucyl aminopeptidase (AHRD V1 ***- D7DWG6_NOSA0); contains Interpro domain(s) IPR011356 Peptidase M17, leucyl aminopeptidase
Solyc12g010180	Anthranilate synthase (AHRD V1 ***- A1KAT4_AZOSB); contains Interpro domain(s) IPR000991 Glutamine amidotransferase class-I, C-terminal
Solyc12g010260	Unknown Protein (AHRD V1)
Solyc12g010350	60S ribosomal protein L39 (AHRD V1 ***- D3GC11_9ROSI); contains Interpro domain(s) IPR000077 Ribosomal protein L39e
Solyc12g015690	Fasciclin-like arabinogalactan protein 10 (AHRD V1 ***- A9XTL5_GOSHI); contains Interpro domain(s) IPR000782 FAS1 domain
Solyc12g019090	Serine/threonine-protein phosphatase 7 long form homolog (AHRD V1 *--- PPP7L_ARATH); contains Interpro domain(s) IPR019557 Aminotransferase-like, plant mobile domain
Solyc12g019230	Polygalacturonase 1 (AHRD V1 ***- O22311_SOLLC); contains Interpro domain(s) IPR000743 Glycoside hydrolase, family 28
Solyc12g019300	Acetolactate synthase small subunit (AHRD V1 ***- Q9SMC2_NICPL); contains Interpro domain(s) IPR019455 Acetolactate synthase, small subunit, C-terminal
Solyc12g040860	Glucan endo-1 3-beta-glucosidase (AHRD V1 ***- B6U1F1_MAIZE); contains Interpro domain(s) IPR000490 Glycoside hydrolase, family 17
Solyc12g042760	LRR receptor-like serine/threonine-protein kinase, RLP
Solyc12g043160	Unknown Protein (AHRD V1); contains Interpro domain(s) IPR015157 Translation machinery associated TMA7
Solyc12g044330	Aquaporin (AHRD V1 ***- O81186_VERFO); contains Interpro domain(s) IPR012269 Aquaporin
Solyc12g045030	Short-chain dehydrogenase/reductase family protein (AHRD V1 **-- D7LV30_ARALY); contains Interpro domain(s) IPR002347 Glucose/ribitol dehydrogenase
Solyc12g049350	Myb 12 transcription factor (AHRD V1 ***- D2EBC3_9SOLN); contains Interpro domain(s) IPR015495 Myb transcription factor
Solyc12g056460	MADS box transcription factor (AHRD V1 **** C3PTE7_POPTO); contains Interpro domain(s) IPR002100 Transcription factor, MADS-box
Solyc12g057040	Cryptochrome 1b
Solyc12g057080	UDP-glucuronosyltransferase (AHRD V1 **-- Q5UB81_ARATH); contains Interpro domain(s) IPR002213 UDP-glucuronosyl/UDP-glucosyltransferase
Solyc12g087940	Aspartic proteinase nepenthesin-1 (AHRD V1 **-- B6TE66_MAIZE); contains Interpro domain(s) IPR001461 Peptidase A1
Solyc12g088170	Hydroxycinnamoyl CoA quinate transferase (AHRD V1 **-- D6BK25_CYNSC); contains Interpro domain(s) IPR003480 Transferase
Solyc12g094480	Unknown Protein (AHRD V1)
Solyc12g094620	Catalase (AHRD V1 ***- Q2PYW5_SOLTU); contains Interpro domain(s) IPR018028 Catalase related subgroup
Solyc12g094640	Glyceraldehyde-3-phosphate dehydrogenase B (AHRD V1 ***- B4F8L7_MAIZE); contains Interpro domain(s) IPR000173 Glyceraldehyde 3-phosphate dehydrogenase
Solyc12g095950	Unknown Protein (AHRD V1)
Solyc12g097040	Unknown Protein (AHRD V1)
Solyc12g098590	UDP-glucosyltransferase family 1 protein (AHRD V1 ***- C6KI42_CITSI); contains Interpro domain(s) IPR002213 UDP-glucuronosyl/UDP-glucosyltransferase
